# Supplementary material
Source: PubMed Central journal article supplement (PMC4316387)
Supplement: NIHMS651780-supplement-2.pdf [file NIHMS651780-supplement-2.pdf]

1 **Uncontrolled Combustion of Shredded Tires in a Landfill**

2 **Part 2: Population Exposure, Public Health Response, and an Air Quality Index for Urban Fires**

3  
4 Ashish Singh,<sup>1</sup> Scott N. Spak,<sup>2</sup> Elizabeth A. Stone,<sup>3</sup> Jared Downard,<sup>3</sup> Robert Bullard<sup>1</sup>, Mark Pooley,<sup>2</sup>  
5 Pamela A. Kostle,<sup>4,†</sup> Matthew W. Mainprize,<sup>4</sup> Michael D. Wichman,<sup>4</sup> Thomas Peters,<sup>5</sup> Douglas  
6 Beardsley,<sup>6</sup> Charles O. Stanier<sup>1,7\*</sup>

7 \*corresponding author: charles-stanier@uiowa.edu, 319-335-1399

8 <sup>1</sup>Chemical and Biochemical Engineering, University of Iowa, Iowa City, IA 52242

9 <sup>2</sup>Public Policy Center, University of Iowa, Iowa City, IA 52242

10 <sup>3</sup>Department of Chemistry, University of Iowa, Iowa City, IA 52242

11 <sup>4</sup>State Hygienic Laboratory-Coralville, University of Iowa, Coralville, IA 52241

12 <sup>5</sup>Department of Occupational and Environmental Health, University of Iowa, Iowa City, IA 52242

13 <sup>6</sup>Johnson County Department of Public Health, Iowa City, IA

14 <sup>7</sup>IIHR Hydroscience and Engineering, University of Iowa, IA

15 <sup>†</sup>Now at University Health Services, University of Wisconsin, Madison, WI

16  
17 **ABSTRACT:**

18 The Iowa City Landfill in eastern Iowa, United States, experienced a fire lasting 18 days in 2012, in  
19 which a drainage layer of over 1 million shredded tires burned, generating smoke that impacted the  
20 surrounding metropolitan area of 130,000 people. This emergency required air monitoring, risk  
21 assessment, dispersion modeling, and public notification. This paper quantifies the impact of the fire on  
22 local air quality and proposes a monitoring approach and an Air Quality Index (AQI) for use in future  
23 tire fires and other urban fires. Individual fire pollutants are ranked for acute and cancer relative risks

24 using hazard ratios, with the highest acute hazard ratios attributed to SO<sub>2</sub>, particulate matter, and  
25 aldehydes. Using a dispersion model in conjunction with the new AQI, we estimate that smoke  
26 concentrations reached unhealthy outdoor levels for sensitive groups out to distances of 3.1 km and 18  
27 km at 24-h and 1-h average times, respectively. Modeled and measured concentrations of PM<sub>2.5</sub> from  
28 smoke and other compounds such as VOCs and benzo[a]pyrene are presented at a range of distances and  
29 averaging times, and the corresponding cancer risks are discussed. Through reflection on the air quality  
30 response to the event, consideration of cancer and acute risks, and comparison to other tire fires, we  
31 recommend that all landfills with shredded tire liners plan for hazmat fire emergencies. A companion  
32 paper presents emission factors and detailed smoke characterization.

33

34

35 **Keywords:** air quality index -; tire fire; Iowa City; hazard ratio

36

## 37 **1. INTRODUCTION**

38 Shredded tire chips are commonly used as landfill drainage lining material. They are permeable  
39 to leachate and protect the landfill liner (Cecich et al., 1996; FEMA/USFA, 2002; Fiksel et al., 2011;  
40 IWMB, 2002; Warith and Rao, 2006). This practice also offers a way to dispose of scrap tires  
41 (FEMA/USFA, 2002). However, shredded and whole tires pose a significant fire risk; they are difficult  
42 to extinguish once ignited and emit criteria pollutants and air toxics when combusted (Lemieux et al.,  
43 2004; Lemieux and Ryan, 1993; USFA, 1998; Wang et al., 2007).

44 The Iowa City landfill's shredded tire drainage layer was accidentally ignited and burned openly  
45 for 18 days beginning May 26, 2012 (Figure 1). The exposed shredded tire drainage layer was 1-m thick  
46 and covered 30,000 m<sup>2</sup> and the fire consumed an estimated 1.3 million tires (20,540 metric tons,

47 assuming 15.8 kg tire<sup>-1</sup>; RMA 2013). The Iowa City landfill was close enough to population centers of  
48 Johnson County, Iowa (population 152,586, U.S. 2010 Census) to impact people through smoke  
49 exposure, including densely populated neighborhoods.

50 Over a dozen major tire fires have occurred in the United States and Canada since 1983 (see  
51 CalEPA, 2002; DEQ, 1989, USFA, 1998; EPA 1997; Ritter, 2013). The Iowa City landfill fire was  
52 approximately five times smaller than the largest U.S. tire fire, the 1983 Rhinehart fire (Ritter, 2013).  
53 These types of fires often exceed one month in duration and pose threats to the health and safety of both  
54 firefighters and the public. In some cases, fires have prompted voluntary evacuations, school closings,  
55 and increased respiratory complaints. On occasion, tire fires have been documented through published  
56 air concentration measurements from environmental agencies (CalEPA, 2002; EPA, 1997; OMOE,  
57 1990; Sidhu et al., 2006; USFA, 1998). Sampling results for polycyclic aromatic hydrocarbons (PAH)  
58 and metal residues on vegetation are also reported (CalEPA, 2002; Steer et al., 1995), as well as cancer  
59 risk assessment conducted using B[a]P concentrations (Sidhu, et al., 2006). While the Iowa City fire  
60 shares many similarities to the listed tire fires, it is, to our knowledge, the first major U.S. tire fire  
61 occurring in a landfill liner system instead of at a tire stockpile location.

62 From public health and air quality perspectives, the response to a large scale tire fire includes  
63 many decisions – what compounds to monitor; where to locate air monitors; whether to use mobile or  
64 fixed samplers; whether to use integrating or continuous techniques; interpretation of multi-pollutant  
65 mixture results across varied averaging times; action levels for warnings, evacuations, and closures;  
66 wording of public notices; recommended actions for reducing exposure; and best practices for using  
67 dispersion modeling.

68 Existing reports from past fires have major shortcomings as a guide to the public health response  
69 (JCPHD, 2012, Downard et al., co-submitted). Shortcomings include a lack of prioritization on what to

70 measure and where to measure it, and a focus on reporting concentrations with limited interpretation of  
71 the public health impact. Past ambient studies rarely incorporate correction for dilution levels – limiting  
72 ability to generalize from measurements. Finally, variety in analyte selection and monitoring protocol is  
73 a challenge, with the monitoring focus varying among PAH, volatile organic compounds (VOCs), fine  
74 particulate matter (PM<sub>2.5</sub>), and CO (CalEPA, 2002).

75 During the Iowa City incident, the public health response was led by the Johnson County  
76 Department of Public Health (JCPH) supported by State Hygienic Lab (SHL), the Iowa Department of  
77 Natural Resources (IDNR), EPA Region 7, and the University of Iowa. The combined measurement of  
78 various pollutants (see Downard et al., co submitted) and modeling work by these organizations enabled  
79 retrospective characterization of ambient concentrations.

80 This paper attempts to improve on the air quality response through a hierarchy of monitoring  
81 priorities for large scale tire fires, a tire fire irritant Air Quality Index (AQI) for interpretation of the  
82 measured values, and a ranking of tire fire components by acute and cancer hazard ratios. We also  
83 examine public health response guidelines and estimate emissions of some compounds not yet sampled  
84 in tire burning by using emissions profiles from open burning of oil (Booher, 1997; Lemieux, 2004).  
85 This work focuses on ambient air pollutants, and does not deal with the many other aspects of the  
86 emergency response.

## 87 **2. Methods**

### 88 **2.1 Monitoring Sites and Instrumentation**

89 Ambient air, often impacted with smoke, was examined at a variety of sites as mapped in Figure  
90 2. Detailed descriptions of methods and instrumentation used to measure CO<sub>2</sub>, CO, SO<sub>2</sub>, particle  
91 number, PM<sub>2.5</sub>, PM<sub>10</sub>, PAH, and trace metals are in Downard et al. (co-submitted). Only additional  
92 measurements and site descriptions, as related to dispersion modeling and public health response, are

93 described here. Additional information on detailed site locations, instruments deployed, and laboratory  
94 methodologies are located in Supplementary materials.

95 Ambient VOC concentrations were determined by EPA methods TO-12 and TO-15 (EPA, 1999).  
96 Ten grab samples, representing background and plume-impacted air, were collected in pre-cleaned 6-L  
97 Summa canisters (Entech Silonite™). Analysis was by gas chromatography (GC) mass spectrometry  
98 (Agilent Technologies 7890A, 5975C; 60 m DB-1 column).

99 Two stationary sites were critical to monitoring. Hoover Elementary School (EPA site ID  
100 191032001) is located 10.5 km east of the Iowa City landfill in a residential area. This station monitors  
101 for 24-h average and hourly PM<sub>2.5</sub> using a low volume FRM sequential air sampler (R&P Model 2025  
102 w/VSCC gravimetric) and a beta attenuation sampler (Met One BAM-1020 w/SCC beta attenuation),  
103 respectively. The University of Iowa Air Monitoring Site (IA-AMS) is located 4.2 km northeast of the  
104 landfill and is situated among recreational fields, low use parking areas, and woodlands.

105

## 106 **2.2 Hazard ratios for tire fire smoke**

107 Hazard ratios compare the ambient concentrations of pollutants to reference concentrations for a  
108 similar averaging period (EPA, 1989). The hazard ratio concept can be used to target specific pollutants  
109 in an exposure situation (Austin, 2008; EPA, 1989; McKenzie et al., 2012; Silverman et al., 2007). The  
110 hazard ratio (HR<sub>*i*</sub>) for species *i* is

$$111 \quad HR_i = \frac{c_i}{c_{ref}} \quad (1)$$

112 where  $c_i$  is the ambient concentration and  $c_{ref}$  is the reference concentration. For the acute hazard ratio  
113 (HRA) we adopt 1-h Acute Exposure Guideline Levels (AEGL-1) (NRC, 2001) for  $c_{ref}$ . AEGL-1 is  
114 defined as “the airborne concentration of a substance above which it is predicted that the general  
115 population, including susceptible individuals, could experience notable discomfort, irritation, or certain

116 asymptomatic nonsensory effects. However, the effects are not disabling and are transient and reversible  
117 upon cessation of exposure.” AEGL values were selected because they were developed specifically for  
118 emergency exposures and are thoroughly documented. For species with no 1-h AEGL, a Short Term  
119 Exposure Limit (STEL) from the American Conference of Industrial Hygienists (ACGIH, 2014), with  
120 the NIOSH STEL, OSHA STEL, and five times the TLV-TWA for the compound as alternate  $c_{ref}$   
121 depending on availability (OSHA, 2006, NIOSH, 1996). For the cancer risk hazard (HRC), the inverse  
122 of the inhalation unit risk factor (IUR) from IRIS (EPA, 2011) or CalEPA (CalEPA, 2003) was used for  
123  $c_{ref}$ .

124 Because individual tire fire studies lack comprehensive species coverage, ratios were calculated  
125 from multiple studies (EPA, 1997; CalEPA, 2002; Downard et al., co-submitted), ranked within study,  
126 and then merged into a unified ranking. Because no tire fire study included some compounds such as  
127 formaldehyde, a laboratory study of pooled crude oil burning was also included (Lemieux et al., 2004).

128

### 129 **2.3 Development of Air Quality Index (AQI) for tire fires**

130 Air quality indices (AQI) are useful for communication of the level of hazard (Chen et al., 2013;  
131 Dimitriou et al., 2013; EPA, 2006; Gurjar et al., 2008; OEHHA, 2012). However, traditional AQI  
132 formulas have drawbacks when applied to an emergency fire situation – 1-h, 8-h and 24-h averaging  
133 time AQI are needed but are not available for all pollutants, and it is not clear how to account for the  
134 multi-pollutant nature of the smoke. Factors such as tire particulate toxicity and the high mutagenicity  
135 of tire fire smoke relative to wood smoke (Lemieux and Ryan, 1993; Lindbom et al., 2006) suggest that  
136 conventional indices may be insufficient for tire fire smoke. We propose an AQI formula for total air  
137 quality index ( $a_{tot}$ ) from summation of the impacts from multiple pollutants:

$$138 \quad a_{tot} = [a_{PM}^p + o_1^p + o_2^p + \dots + o_m^p + u_1^p + u_2^p + \dots + u_n^p]^{1/p} \quad (2)$$

139 Equation 2 includes the concentrations of  $PM_{2.5}$  ( $a_{PM}$ ),  $m$  co-pollutants ( $o_m$ ), and  $n$  unmeasured  
140 compounds ( $u_n$ ). Summation is appropriate when pollutants share a common health effect and mode of  
141 action (Murena, 2004; Plaia and Ruggieri, 2011). In the case of the tire fire smoke, most of the  
142 pollutants are respiratory irritants, and we propose summation over the irritant compounds. The  
143 exponent ( $p$ ) controls the nature of the summation process; as  $p$  increases, the summation becomes  
144 dominated by the highest air quality index in the summation. A fixed  $p$  value of 2.5 has been proposed  
145 (Kyrkilis et al., 2007), which heavily weights the maximum AQI. In this study, results from  $p$  exponents  
146 of both 1 and 2.5 are explored, and the main results and discussion are reported using a  $p$  exponent of 1.

147 The AQI values for all compounds were calculated using linear interpolation between AQI  
148 breakpoints (EPA, 2009). Breakpoints for  $PM_{2.5}$  were from OEHHA (2012), which are based on the  
149 EPA NAAQS but extend to 8-h and 1-h averaging periods. The NAAQS-based  $SO_2$  AQI breakpoints  
150 are adopted uniformly for 24-h, 8-h, and 1-h averaging times.

151 For all other species, NAAQS based thresholds are not available, and AEGL were used if  
152 available. A full complement of AEGL mixing ratios consists of 15 values, corresponding to 5  
153 averaging times and 3 thresholds: AEGL-1 (defined in section 2.2), AEGL-2 (irreversible or other  
154 serious adverse health effects), and AEGL-3 (life-threatening). For some compounds, AEGL  
155 concentrations are not available, and the AQI breakpoints rely on STEL instead, as described in section  
156 2.2. Due to the high concentrations involved in the tire fire, and the high STEL and AEGL of some  
157 compounds, linear extrapolation of AQI values in excess of 500 was performed.

158  $SO_2$  has NAAQS-based AQI breakpoints as well as AEGL values and a STEL. Therefore, it is  
159 used to translate from concentrations relative to AEGL or STEL (available for many compounds) to  
160 concentrations relative to an AQI (available for  $SO_2$ ). Specifically, the AQI of pollutant  $i$  is calculated  
161 by

162 
$$a_i = a_{SO_2}(f_{AEGL}^{-1}(\overline{AEGL}_{SO_2}, f_{AEGL}(\overline{AEGL}_i, c_i))) \quad (3)$$

163 where  $f_{AEGL}$  is a piecewise linear function with two inputs: (a) the 3 AEGL values of species  $i$  (denoted  
164 by the vector  $\overline{AEGL}_i$ ), and (b)  $c_i$ .  $f_{AEGL}$  is 0 at  $c_i$  of 0, and 1, 2 and 3, respectively at concentrations of  
165 AEGL-1, AEGL-2, and AEGL-3.  $f_{AEGL}^{-1}$  is the inverse function that returns the concentration that will  
166 give a specific value of  $f_{AEGL}$ . For  $SO_2$ , the AEGL-1, 2, and 3 mixing ratios are 200, 750, and 30,000  
167 ppb, respectively. The 1-h NAAQS (also the value for an AQI of 100) is 75 ppb, and the STEL is 250  
168 ppb. Therefore, for  $SO_2$ , the AEGL-1, 2, and 3 values occur at AQI values of 224, 700, and 28,000,  
169 respectively, and the  $SO_2$  STEL occurs at an AQI value of 256.

170  $PM_{2.5}$  was used as a tracer of the tire fire smoke. That is, we considered tire fire smoke by its  
171  $PM_{2.5}$  concentration (denoted  $PM_t$ ), and then calculate the concentrations of all co-pollutants (e.g.  $SO_2$ ,  
172 formaldehyde, VOCs) using the ratio of the co-pollutant emission factor to that of  $PM_t$ . The various  
173 AQI values are combined according to equation 2. An example 1-h AQI calculation is shown in  
174 Supplementary materials.

## 175 **2.4 Dispersion modeling**

176 Two dispersion models, Hazard Prediction and Assessment Capability model (HPAC) version  
177 5.0 MB (Sykes and Gabruk, 1997) and AERMOD (EPA-454/R-03-004, September 2004 release 0726)  
178 (EPA, 2004) were run independently, with results first available beginning on May 30, the fourth full  
179 day of the fire. Both models were provided to the incident command group to help plan activities, and  
180 to understand potential impacts on populated areas (Holmes and Morawska, 2006; Kakosimos et al.,  
181 2011; Morra et al., 2009).

182 The Iowa National Guard's 71<sup>st</sup> Civil Support Team requested dispersion modeling from the  
183 Defense Threat Reduction Agency (DTRA). DTRA modeled the landfill fire as combustion of oil using  
184 the HPAC.



185 AERMOD (EPA-454/R-03-004, September 2004 release 0726) (EPA, 2004) was used with  
186 regional forecast meteorology (60 hour forecast) from the Weather Research and Forecasting model  
187 (WRF) 3.3.1 (Skamarock et al., 2008). The WRF configuration included 24 vertical layers from the  
188 surface to 5 km, 4 km horizontal resolution, ACM2 planetary boundary layer scheme (Pleim, 2007), and  
189 initial conditions and observational constraint from the North American Mesoscale Model. WRF  
190 profiles were processed for AERMOD using MCIP2AERMOD (Davis et al., 2008).

191 WRF/AERMOD simulated dispersion to a 100 m receptor grid from an area source covering the  
192 burning landfill cells. All receptors were placed 2 m above terrain height. In forecasting, the smoke  
193  $PM_{2.5}$  emission rate was set at 0.4 g/s ( $10 \mu\text{g}/\text{m}^2\text{-s}$ ) to match early field observations of the plume (site  
194 BDR on May 30, 20:00). For retrospective modeling to reconstruct concentrations, the emission rate for  
195 smoke was adjusted to minimize the average of the absolute fraction errors of observed plumes.  
196 Specifically, the peak model concentration at the distance of the monitoring location was compared to  
197 the observed peak at 10 min averaging time (where available) or hourly average concentration. Cases  
198 with the modeled plume more than  $40^\circ$  away from the measurement location were excluded.

199

### 200 **3. Results and Discussion**

201 The fire was first reported during the evening of May 26, 2012. The impact of the landfill fire  
202 plume on individual stationary sites was episodic and depended strongly on wind direction, dilution, and  
203 emission rates that vary due to firefighting activities, temperature, and atmospheric conditions (Akagi et  
204 al., 2012; CalEPA, 2002; JCPHD, 2012; Kwon and Castaldi, 2009). The tire fire was declared under  
205 control and smoke emission was almost eliminated as of June 12, 2012. The plume was well-dispersed  
206 during a majority of the fire-affected period due to meteorology. During these periods, its influence was  
207 localized. Conversely, two stable periods with low boundary layer heights and significant smoke

208 accumulation over more widespread areas were identified (June 1-3 and June 7-8). Chronology of  
209 weather, PM concentrations, sampler activities, and model highlights are found in Supplementary  
210 materials. Concentrations of PM<sub>2.5</sub>, SO<sub>2</sub>, and PAH were used to develop emission factors and are  
211 discussed in Downard et al. (co-submitted). VOC concentrations are reported in section 3.1 prior to  
212 their use in hazard ratio calculations.

### 213 **3.1 VOC**

214 A total of 54 VOCs were quantified from May 27 to June 2 in both background and impacted  
215 locations. Tire fires are known to be a major source of VOCs (Lemieux and Ryan, 1993). Table 3  
216 reports a selected list of VOC concentrations in a representative plume-impacted sample taken on May  
217 28 at 300 m from the fire with additional data in Supplementary materials. Significant increments in  
218 concentration over background were observed for many aromatic VOCs such as benzene, toluene, ethyl  
219 toluene, dimethyl benzene, xylene and styrene, as well as aliphatics (e.g., propane, butane). Fewer  
220 carbonyls were measured, but acrolein showed enhancement. Several hydrocarbon concentrations were  
221 below detection limit.

222 Benzene concentrations ranged from 0.05-0.07 ppbv in background samples and increased to 8.3  
223 ppbv and remained elevated in some samples (e.g., 0.63 ppbv 8.0 km downwind). Toluene was present  
224 at 8.7 ppbv in the plume and 0.50 ppbv downwind. Synthetic rubber components butadiene and styrene  
225 are typically below detection limits in Iowa City but were 0.5-1 ppbv at 300 m from the fire. The  
226 benzene concentrations were well below a number of relevant reference concentrations, such as the  
227 OSHA STEL (1000 ppb), the ACGIH TLV-TWA (100 ppb), and the AEGL-1 (52,000 ppb, 1-h) but  
228 close to the lower ATSDR minimum risk level of 9 ppb (ATSDR 2013).

229

### 230 **3.2 Identification of key pollutants from hazard ratio analysis**

231 Calculated cancer and acute hazard ratios (HRA and HRC) are summarized in Tables 2 and 3,  
232 respectively, with details on ambient concentration measurements and reference concentration values,  
233 from multiple studies in Supplementary materials. Acute hazard ratios can be found in the parenthesis  
234 in Table 2. Note that hazard ratios from different ambient concentration measurements (e.g., the  
235 Westley vs. the Iowa City VOCs) cannot be directly compared to each other or to the hazard ratios based  
236 on emission factors. Only the relative orderings can be compared. SO<sub>2</sub>, PM<sub>2.5</sub>, black carbon (BC), and  
237 air toxic VOCs had the highest rankings when assessed using concentrations or emission factors from  
238 Iowa City. In other studies with tire smoke, BC, biphenyl, benzene, benzaldehyde, PM, and CO were  
239 highly ranked hazards. SO<sub>2</sub>, which receives the highest ranking by AEGL-based hazard ranking has  
240 limited published emission factors. For example, it is not listed as an emission factor in Lemieux and  
241 Ryan (1993); however, Lemieux and Ryan did publish an SO<sub>2</sub> and CO time series for a tire fire test that  
242 corroborates the high placement of SO<sub>2</sub> in our hazard ratio ranking. The test had an SO<sub>2</sub>/CO mixing  
243 ratio of ~0.2-0.33 which corresponds to HRA<sub>SO<sub>2</sub></sub>/HRA<sub>CO</sub> of 400-660.

244 Aldehydes have not been extensively measured in tire fire emissions, but are known components  
245 of smoke from burning oil. Aldehydes include strong irritants with low reference concentrations, and  
246 formaldehyde, benzaldehyde, and acrolein have high rankings according to their HRA. Accordingly, we  
247 expect these compounds to play a role in the health impacts of the smoke, and recommend further study  
248 of their emissions.

249 Hazard ratio rankings within an order of magnitude of each other were grouped to generate a  
250 merged ranked list of the most hazardous compounds found in the righthand column of Table 2.  
251 Compounds common to multiple studies (benzene, 1,3-butadiene, PM and CO) provided benchmarks for  
252 relative rankings. The unified acute hazard ratio for tire fires includes SO<sub>2</sub> > PM > BC > Acrolein,  
253 Formaldehyde > CO > Benzene, Benzaldehyde, Biphenyl, 4-Vinyl-1-Cyclohexene, and Phenol as the

254 higher ranked compounds. Monitoring and risk assessment should prioritize compounds with high  
255 hazard ratios.

256 Table 3 lists the cancer hazard ratio results. These were calculated using two alternate methods.  
257 One method was to consider B[a]P, which has been used in past cancer risk screenings of tire fires, as  
258 well as gases for which there are URF values. The resulting ordering is B[a]P > benzene > 1,3-  
259 butadiene > naphthalene > formaldehyde > acetaldehyde > ethylbenzene. B[a]P has the highest HRC in  
260 all tire fire datasets examined, using a URF of  $1.1 \times 10^{-3} (\mu\text{g}/\text{m}^3)^{-1}$ . The alternate method is to also  
261 include tire fire  $\text{PM}_{2.5}$  as a potential carcinogen, applying the diesel particulate matter URF [ $3.04 \times 10^{-4}$   
262  $(\mu\text{g}/\text{m}^3)^{-1}$ , CalEPA, 2003]. In that case, the cancer risk is dominated by  $\text{PM}_{2.5}$ , as the  $\text{PM}_{2.5}$  risk factor  
263 exceeds that of B[a]P by more than 2 orders of magnitude. Future research and cancer screenings should  
264 consider this more conservative approach of treating the PM in tire fire smoke as a carcinogen.

265

### 266 **3.3 Tire fire irritant smoke AQI**

267 The 24-h AQI of tire fire smoke measured as  $\text{PM}_{2.5}$  ( $\text{PM}_t$ ) is shown in Figure 3. It is calculated  
268 for two values of p (1 and 2.5, respectively) in the absence of background PM.  $26 \mu\text{g}/\text{m}^3$  of tire fire  
269 smoke equates to an AQI of 100 using with  $p=1$ , which can be contrasted to the ambient  $\text{PM}_{2.5}$   
270 concentration of  $35.4 \mu\text{g}/\text{m}^3$  required for the same AQI. When tire fire smoke  $\text{PM}_{2.5}$  is  $26 \mu\text{g}/\text{m}^3$ , it is  
271 expected to contain 13 ppb of  $\text{SO}_2$  and 3.4 ppb of benzene. The contribution to the AQI at that  
272 concentration was 80% from  $\text{PM}_{2.5}$ , 19% from  $\text{SO}_2$ , and 1% from other gases. The  $p=2.5$  curve crosses  
273 the AQI 100 threshold at a  $\text{PM}_t$  concentration of  $34.8 \mu\text{g}/\text{m}^3$ . Tabulated results from a tire fire irritant  
274 smoke calculation for a 1-h AQI at a  $\text{PM}_t$  value of  $100 \mu\text{g}/\text{m}^3$  can be found in Table 4, and a lookup  
275 table of AQI values as a function of tire fire smoke and ambient  $\text{PM}_{2.5}$  is in Table 5. It is anticipated that

276 an incident command team could use a lookup table such as Table 5, or an equivalent tool, during a fire  
277 response to interpret monitoring and/or dispersion modeling data.

278 Carbon monoxide and B[a]P were included in Table 3 but not in the AQI calculation because  
279 their health impacts do not include respiratory irritation. Carbon monoxide has serious health effects  
280 and should be considered during tire fires; however, using the emission ratios of this work, and the  
281 concentrations needed to reach levels equivalent to an AQI of 100, a tire fire smoke AQI for CO will be  
282 less than 10% of the value calculated from  $PM_t$  alone, and less than 17% of that calculated from  $SO_2$   
283 alone.  $H_2S$  is a respiratory irritant with a low AEGL-1 possibly in tire fire smoke (WDHFS, 2006). Its  
284 emission factor is largely unknown, and it is not included in reported AQI values from Iowa City, but  
285 including it using an emission factor derived from reported  $H_2S/CO$  ratios would increase the AQI  
286 values by about 5%. A detailed example of a tire fire smoke AQI calculation can be found in  
287 Supplementary Material.

288 Some factors may cause the AQIs presented in this work to be lower limits than those that could  
289 (and perhaps should) be calculated. These include the fact that (1) we treat tire fire smoke  $PM_{2.5}$  the  
290 same as ambient  $PM_{2.5}$  without any multiplier to account for its properties; (2) we neglect the impacts of  
291 the coarse fraction of tire fire smoke; (3) the AEGL-1 concentrations for many of the VOCs in this work  
292 are higher than other threshold concentrations that could also be justified. Counterbalancing these are  
293 the use of  $p=1$  in AQI in the figures and tables of this work (besides Figure 3 which includes both), and  
294 the use of the NAAQS 24-h  $PM_{2.5}$  value of  $35.4 \mu g m^{-3}$  as a key threshold for the AQI when other higher  
295 thresholds could also be justified, such as the occupational limit of respirable dust, which ranges from 3-  
296  $5 mg/m^3$ . We feel that summing over irritating components of the tire fire smoke (i.e., using  $p=1$ ) is  
297 justified because it is a conservative, protective assumption, and furthermore, it counterbalances some of  
298 the factors listed above that serve reduce the AQI.

### 300 **3.4 Application of AERMOD as an emergency response tool for landfill fire dispersion**

301 The emission rate from the fire is a necessary parameter for quantitative dispersion modeling,  
302 and this was unknown during the initial days of the fire. Three particulate mass measurements at BDR  
303 (see Figure 1, May 30, Downard et al. co-submitted) were used to calculate a preliminary emission rate  
304 of 0.4 g/s to match observed plume impact. For retrospective assessment of ambient concentrations, this  
305 emission rate was scaled to minimize model error as described in the methods section, resulting in a  
306 minimum average absolute fractional error of 0.87 for a scaling factor of 3.6 ( $r^2$  of model-observation  
307 pairs 0.61; model mean 26  $\mu\text{g}/\text{m}^3$ ; observation mean 19  $\mu\text{g}/\text{m}^3$ ;  $n=20$ ).

308 Figure 4 maps AERMOD predicted tire fire smoke concentrations from May 26 - June 8, 2012  
309 for the 1-h maximum (Fig. 4a) and 24 h maximum (Fig. 4b)  $\text{PM}_{2.5}$ . The 1-h maximum has an additional  
310 2.6 multiplier to reflect potential temporal variability in emission rate, based on the ratio of the  
311 maximum to the average  $\text{PM}_{2.5}$  emission factor in Downard et al. (co-submitted). The highest  
312 concentration in the 1-h map is 3900  $\mu\text{g}/\text{m}^3$  located at the landfill. AERMOD 1-h maximum  
313 concentration of tire fire  $\text{PM}_{2.5}$  smoke for the study period at distances of 1, 2, 3, 5 and 10 km were 243,  
314 131, 80, 55 and 26  $\mu\text{g}/\text{m}^3$ , respectively. Likewise 8-h (not shown) and 24-h maximum concentrations at  
315 the same distances were 107, 42, 27, 15 (8-h) and 60, 25, 16, 9 and 4 (24-h)  $\mu\text{g}/\text{m}^3$ , respectively.

316 AQI values in Figure 4 were calculated for the  $p=1$  case. Exposure risks within a radius of  
317 approximately 1.5 km from the fire were clearly in the unhealthy zone during at least 1 hour of the fire  
318 and smoke levels as far as 18 km downwind were also likely to exceed AQI values of 100 for at least 1  
319 hour of the event. Risks based on 24-h max  $\text{PM}_{2.5}$  concentration also suggest areas as far as 3.1 km from  
320 the fire reached an unhealthy AQI for sensitive subpopulations. The recommended action for such  
321 zones, according to the OEHHA air quality index, is to consider closing sensitive areas such as schools,

322 and cancelling outdoor events. Air quality in areas further than 3 km downwind from the fire was  
323 moderate when considering 24 h and longer averaging time periods.

324 Based on the modelled  $PM_{2.5}$  average for the duration of the tire fire, an increased cancer risk is  
325 calculated for B[a]P, the compound used in past tire fire cancer risk estimates, as well as  $PM_{2.5}$ . The  
326 B[a]P to  $PM_{2.5}$  ratio in the smoke is  $7 \times 10^{-4}$  (Downard et al., co-submitted). At the most impacted  
327 location (1 km) from the fire, the modeled mean concentrations during the fire period were  $5.5 \mu\text{g}/\text{m}^3$   
328 and  $3.8 \text{ ng}/\text{m}^3$  of tire fire  $PM_{2.5}$  and B[a]P, respectively. The corresponding potential cancer risks are  
329  $1.2 \times 10^{-6}$  and  $3.0 \times 10^{-9}$ , respectively. To compare, the cancer risk for B[a]P of  $7.0 \times 10^{-9}$  during the Blair  
330 Township tire fire was similar (Sidhu et al., 2006). The B[a]P assessments of Sidhu and in Iowa City  
331 were both below the common acceptable risk threshold of  $1 \times 10^{-6}$ , while the value for  $PM_{2.5}$  using the  
332 diesel PM URF, exceeded it. The applicability of the diesel particulate matter URF to  $PM_t$  has not been  
333 established, but is used here due to the lack of other information about the cancer risks of the PM  
334 components of tire fire smoke.

335

### 336 **3.5 Lessons learned for emergency response and monitoring**

337 Review of notable tire fires in the US and Canada indicates a wide variety of air quality  
338 responses during emergency situations. We offer some recommendations for emergency air quality  
339 response in Table 6. The recommendations are in part based on a local multi-agency retrospective  
340 review (JCDPH, 2012) of the public health response to the Iowa City fire.

341 With respect to what compounds to target for monitoring and monitor placement, any of the high  
342 hazard ratio compounds (e.g.,  $SO_2$ ,  $PM_{2.5}$ , CO, black carbon PM, formaldehyde, acrolein) are sufficient.  
343 Concentrations of unsampled pollutants can be estimated using emission ratios. For example, the AQI in

344 this work uses emission factor ratios based on PM. An example of an expanded AQI reference table  
345 with pollutants other than PM<sub>2.5</sub> as the smoke tracer can be found in Supplemental Materials.

346 A distance of 1-3 km radius from the fire provides the most actionable data for the public health  
347 response. At this distance, the plume will have undergone initial dispersion and plume processing and  
348 will allow for measurement of the plume and background air. Additional monitoring within 1 km of the  
349 source can be added if warranted by public health concerns with respiratory protection for monitoring  
350 personnel. Monitoring can be added at specific locations that may be of interest to determine or verify  
351 population exposure.

352 Stationary monitoring at 24-h time resolution is listed in Table 6 as lower priority, and this  
353 designation requires explanation. 24-h time resolution samples are useful for verifying impacts on  
354 populated areas, but they are not spatially representative (for example see Figure 4) and do not permit  
355 estimation of source strength and dispersion model calibration unless the duration of plume impact  
356 periods is well known. VOC speciation is similarly listed in Table 6. Because of the modest impact that  
357 VOCs had in the hazard ratio and AQI analysis, we list them as lower priority. However, the VOC  
358 sampling can be an important part of the monitoring response. VOCs do serve as a tracer for the smoke,  
359 and measurements can confirm uncertain source profile estimates.

360 Ideally, both rapid sampling (instantaneous to 10 min integration) and integrated sampling at 1, 8  
361 or 24 h averaging time should take place at fixed locations for assessing population exposure potential.  
362 We recommend that (i) at least one compound be measured by both short term methods (<10 min) and  
363 integrated sampling (1 to 24-h) at the same location during plume impaction event(s); and (ii) that short  
364 term samplers, such as grab measurements, be co-located and operated simultaneously for some  
365 samples. This sampling strategy has numerous desirable characteristics. It directly measures both  
366 background and plume concentrations (by the instantaneous and real-time instruments); it allows



367 estimation of concentration impacts at longer averaging times (using integrated samplers); it allows  
368 intercomparison of instruments (thus permitting calculation of concentration ratios and/or emission  
369 factors); it spatially constrains the plume (via a network of fixed site real-time instruments); and it is  
370 well-suited for calibration or evaluation of dispersion models.

371 We recommend that concentrations from dispersion modeling and monitors be converted to an  
372 AQI scale that the incident command team has been trained on; concentration predictions without  
373 interpretation may not be actionable for local responders. In the absence of other data, we recommend a  
374  $PM_{2.5}$  emission rate of 5.3 g per kg of combusted tire (Downard et al., co-submitted) if the mass burn  
375 rate can be estimated, and  $36 \mu\text{g } PM_{2.5} \text{ m}^{-2}\text{s}^{-1}$  if not but the extent of the fire is known.

376 As reiterated in the FEMA tire fire manual and other documents (IWMB, 2002; OSFM, 2004;  
377 USFA, 1998), a pre-planning incident plan is critical for responding intelligently to any hazmat fire.  
378 Landfills utilizing shredded tires should preplan for a hazmat fire in the liner system. One potentially  
379 transferrable preplanning structure is North Carolina's multiagency Air Toxic Analytical Support Team,  
380 or ATAST (NCDAQ, 2014).

381 As highlighted in Table 6, pre-planning should include a scheduled exercise where multiagency  
382 response is simulated. Such exercises are critical for developing competence with the necessary  
383 sampling protocols, and at identifying problems in the emergency response, such as gaps in training,  
384 communication, incident command structure, or equipment. A scheduled exercise would deal with one  
385 item noted in the Iowa after action review: confusion on communication protocols for contacting state  
386 and federal resources, and uncertainty on the extent and nature of the federal response once contact was  
387 made. In the Iowa City event, the federal response was advisory (from EPA and DTRA), but in other tire  
388 fires EPA deployed equipment and personnel. The exercise should include predetermination of public  
389 health messages, distribution outlets, and public health protection measures (closures, cancellations,

390 evacuations, etc.) relative to anticipated AQI level or other concentration-based action levels. Finally, it  
391 is important to identify agencies or service providers with equipment and expertise to implement or  
392 guide an air monitoring response, and to establish how resources will be procured (e.g., establish  
393 contracts or memoranda of understanding).

394 Several research needs were identified based on the Iowa incident and follow up analysis.  
395 Additional work is warranted on multiple pollutant risk assessment. Calibrated, low-cost, portable, and  
396 battery-powered monitors with wireless data reporting features are needed to streamline emergency  
397 monitoring network deployment. In terms of smoke composition, research needs include refinement of  
398 emission factors and their sensitivity to combustion conditions, with specific emphasis on H<sub>2</sub>S,  
399 aldehydes, organic vs. elemental carbon, metals speciation, and organics speciation of total and size-  
400 resolved PM. Characterization of the mass distribution, deposition lifetime, and morphology of smoke  
401 particles is also needed. Finally, within the public policy and waste management community,  
402 reassessment of the costs, risks, and benefits of shredded tire landfill drainage systems is warranted  
403 given the potential fire and public health risk.

#### 404 **4. Conclusions**

405 We have assessed the outdoor concentrations of pollutants generated from the 18 day 2012 Iowa  
406 City tire fire at a variety of averaging times. We estimated maximum concentrations (1-h) of tire fire  
407 PM<sub>2.5</sub> smoke at distances of 1, 5 and 10 km of 243, 55 and 26 µg/m<sup>3</sup>, respectively. Likewise 24-h  
408 maximum concentrations at the same distances were 60, 9 and 4 µg/m<sup>3</sup>, respectively. Use of hazard  
409 ratios to screen many components in the tire fire smoke, and adoption of a novel multi-pollutant AQI  
410 system for irritant smoke will improve decision support capabilities and streamline monitoring  
411 strategies. For example, the use of the AQI establishes that smoke concentrations reached unhealthy  
412 outdoor levels out to distances of 1.6 km and 11 km at 24-h and 1-h averaging times, respectively. The

413 fire constituted a serious public health concern, and we report recommendations for responding to future  
414 comparable incidents – preplanning, monitoring, dispersion modeling, and future research needs. We  
415 stress that the emission rate, speciation, and meteorology of each tire fire are unique, and while we  
416 believe our findings are generalizable, the extent of variability, especially in emissions speciation, is not  
417 well quantified.

418

419 Acknowledgements: The authors would like to acknowledge Andy Gross of the Defense Threat  
420 Reduction Agency for discussions on dispersion modeling. Funding was provided by the University of  
421 Iowa Environmental Health Sciences Research Center through the National Institutes of Health (NIH,  
422 428 P30 ES05605) and NASA grant NNX11AI52G.

#### 423 **References**

424 Akagi, S.K., Craven, J.S., Taylor, J.W., McMeeking, G.R., Yokelson, R.J., Burling, I.R., Urbanski, S.P., Wold,  
425 C.E., Seinfeld, J.H., Coe, H., Alvarado, M.J., Weise, D.R., 2012. Evolution of trace gases and particles  
426 emitted by a chaparral fire in California. *Atmospheric Chemistry and Physics* 12, 1397-1421.

427 Austin, C., 2008. Wildland firefighter health risks and respiratory protection, Montreal, Canada, pp. 1-52.

428 CalEPA, 2002. Tire fire report office of environmental health hazard assessment. California Environmental  
429 Protection Agency, California, pp. 1-20.

430 CalEPA, 2003. Toxicity Criteria Database. California Environmental Protection Agency California  
431 Environmental Protection Agency, California.

432 Cecich, V., Gonzales, L., Hoiisaeter, A., Williams, J., Reddy, K., 1996. Use of shredded tires as lightweight  
433 backfill material for retaining structures. *Waste Management & Research* 14, 433-451.

434 Chen, R., Wang, X., Meng, X., Hua, J., Zhou, Z., Chen, B., Kan, H., 2013. Communicating air pollution-related  
435 health risks to the public: An application of the Air Quality Health Index in Shanghai, China.  
436 *Environment International* 51, 168-173.

437 Davis, N., Arunachalam, S., Brode, R., 2008. MCIP2AERMOD: a prototype tool for preparing meteorological  
438 inputs for AERMOD. , 7 th Annual Models-3 CMAS Users Conference CMAS, Chappel Hill, North  
439 Carolina, p. 21.

440 Dimitriou, K., Paschalidou, A.K., Kassomenos, P.A., 2013. Assessing air quality with regards to its effect on  
441 human health in the European Union through air quality indices. *Ecological Indicators* 27, 108-115.

442 EPA, 1989. Risk Assessment Guidance for Superfund Volume I Human Health Evaluation Manual ( Part A ).  
443 Environmental Protection Agency, Washington D.C.

444 EPA, 1997. Air emissions from scrap tire combustion. Environment Protection Agency, Washington, D.C.

445 EPA, 1999. Copenidium Methods TO-15: Determination of Volatile Organic Compounds (VOCs) in Air Collected  
446 In Specially-Prepared Canisters and Analyzed by Gas Chromatography/Mass Spectrometry (GC/MS)

447 EPA, 2004. Aermom : Description of model formulation. Environmental Protection Agency, North Carolina.

448 EPA, 2006. Guidelines for the Reporting of Daily Air Quality – the Air Quality Index (AQI). U.S.  
449 EnvironmentalProtection Agency, Research Triangle Park, North Carolina.

450 EPA, 2009. Technical Assistance Document for the Reporting of Daily Air Quality – the Air Quality Index  
451 (AQI). Environment Protection Agency, Research Triangle Park.

452 EPA, 2011. Integrated Risk Information System (IRIS). EPA, Washington DC.

453 FEMA/USFA, 2002. Landfill fires: Their magnitude, characteristics and mitigation. Federal Emergency  
454 Management Agency, Arlington , Virginia, pp. 1-26.

455 Fiksel, J., Bakshi, B.R., Baral, A., Guerra, E., DeQuervain, B., 2011. Comparative life cycle assessment of  
456 beneficial applications for scrap tires. *Clean Technologies and Environmental Policy* 13, 19-35.

457 Gurjar, B.R., Butler, T.M., Lawrence, M.G., Lelieveld, J., 2008. Evaluation of emissions and air quality in  
458 megacities. *Atmospheric Environment* 42, 1593-1606.

459 Holmes, N.S., Morawska, L., 2006. A review of dispersion modelling and its application to the dispersion of  
460 particles: An overview of different dispersion models available. *Atmospheric Environment* 40, 5902-  
461 5928.

462 IWMB, 2002. Tire Pile Fires : Prevention , Response , Remediation. Integrated Waste Management Board, Santa  
463 Ana, California.

464 JCPHD, 2012. After Action Review – Air Quality Monitoring Activities during Iowa City Landfill fire, in:  
465 Department of Public Health, J.C. (Ed.). Johnson County, Iowa City.

466 Kakosimos, K.E., Assael, M.J., Katsarou, A.S., 2011. Application and evaluation of AERMOD on the assessment  
467 of particulate matter pollution caused by industrial activities in the Greater Thessaloniki area.  
468 *Environmental Technology* 32, 593-608.

469 Kwon, E., Castaldi, M.J., 2009. Fundamental understanding of the thermal degradation mechanisms of waste tires  
470 and their air pollutant generation in a N<sub>2</sub> atmosphere. *Environmental science & technology* 43, 5996-  
471 6002.

472 Kyrkilis, G., Chaloulakou, A., Kassomenos, P.A., 2007. Development of an aggregate Air Quality Index for an  
473 urban Mediterranean agglomeration: Relation to potential health effects. *Environment International* 33,  
474 670-676.

475 Lemieux, P.M., Lutes, C.C., Santoianni, D.A., 2004. Emissions of organic air toxics from open burning: a  
476 comprehensive review. *Progress in Energy and Combustion Science* 30, 1-32.

477 Lemieux, P.M., Ryan, J.V., 1993. Characterization of Air-Pollutants Emitted from a Simulated Scrap Tire Fire.  
478 *Journal of the Air & Waste Management Association* 43, 1106-1115.

479 Lindbom, J., Gustafsson, M., Blomqvist, G., Dahl, A., Gudmundsson, A., Swietlicki, E., Ljungman, A.G., 2006.  
480 Exposure to wear particles generated from studded tires and pavement induces inflammatory cytokine  
481 release from human macrophages. *Chemical Research in Toxicology* 19, 521-530.

482 McKenzie, L.M., Witter, R.Z., Newman, L.S., Adgate, J.L., 2012. Human health risk assessment of air emissions  
483 from development of unconventional natural gas resources. *Science of the Total Environment* 424, 79-87.

484 Morra, P., Lisi, R., Spadoni, G., Maschio, G., 2009. The assessment of human health impact caused by industrial  
485 and civil activities in the Pace Valley of Messina. *Science of the Total Environment* 407, 3712-3720.

486 Murena, F., 2004. Measuring air quality over large urban areas: development and application of an air pollution  
487 index at the urban area of Naples. *Atmospheric Environment* 38, 6195-6202.

488 NCDAQ, 2014. Emergency Response Protocol. North Carolina Division of Air Quality, Raleigh, NC.

489 NRC, 2001. Acute Exposure Guideline Levels for Selected Airborne Chemicals: Volume 1. National Research  
490 Council, Washington D.C.

491 OEHHA, 2012. Wildfire Smoke : A guide for public health officials. Air Resource Board, OEHHA, California,  
492 pp. 23-24.

493 OMOE, 1990. Hagersville Tire Fire (1990) Survey: Technical Memorandum. Atmospheric Research And  
494 Special Programmes Section, Air Resource Branch, Ontario.

495 OSFM, 2004. Rings of Fire Revisited: Fire Prevention and Suppression of outdoor Tire Storage. Office of the  
496 State Fire Marshal, California.

497 Plaia, A., Ruggieri, M., 2011. Air quality indices: a review. Reviews in Environmental Science and Bio-  
498 Technology 10, 165-179.

499 Pleim, J.E., 2007. A combined local and nonlocal closure model for the atmospheric boundary layer. Part I:  
500 Model description and testing. Journal of Applied Meteorology and Climatology 46, 1383-1395.

501 Ritter, K.S., 2013. Tire Inferno, C & EN NEWS, pp. 10-15.

502 Sidhu, K.S., Keeslarm, F.L., Warner, P.O., 2006. Potential health risks related to tire fire smoke. Toxicology  
503 international 13, 1-17.

504 Silverman, K.C., Tell, J.G., Sargent, E.V., 2007. Comparison of the industrial source complex and AERMOD  
505 dispersion models: Case study for human health risk assessment. Journal of the Air & Waste Management  
506 Association 57, 1439-1446.

507 Skamarock, W.C., Klemp, J.B., Dudhia, J., Gill, D.O., Barker, D.M., Duda, M., Huang, X.-Y., Wang, W.,  
508 Powers, J.G., 2008. NCAR Technical Note: Description of the Advanced Research WRF Version 3.  
509 Mesoscale and Microscale Meteorology Division, National Center for Atmospheric Research, Boulder,  
510 Colorado.

511 Steer, P.J., Tashiro, C.H.M., McIlveen, W.D., Clement, R.E., 1995. PCDD AND PCDF IN AIR, SOIL,  
512 VEGETATION AND OILY RUNOFF FROM A TIRE FIRE. Water Air and Soil Pollution 82, 659-674.

513 USFA, 1998. Special Report : Scrap and Shredded Tire Fires, Technical Report Series. United States Fire  
514 Administration, Maryland.

515 Wang, Z., Li, K., Lambert, P., Yang, C., 2007. Identification, characterization and quantitation of pyrogenic  
516 polycyclic aromatic hydrocarbons and other organic compounds in tire fire products. Journal of  
517 chromatography. A 1139, 14-26.

518 Warith, M.A., Rao, S.M., 2006. Predicting the compressibility behaviour of tire shred samples for landfill  
519 applications. Waste Management 26, 268-276.

520 WDHFS, 2006. Health Consultation : WATERTOWN TIRE FIRE TOWN OF SHIELDS, DODGE COUNTY,  
521 WISCONSIN, Atlanta, Georgia.

522

523

## Caption for figures and tables

### Figures

Figure 1: Photograph of the Iowa City landfill fire, with smoke primarily from the burning shredded tire drainage layer

Figure 2: Map of the study area shaded by Census 2010 block group population density (persons/km<sup>2</sup>). Symbols mark locations of air quality samples from mobile sampling (green triangles), VOC grab samples (yellow circles), and long-term PM<sub>2.5</sub> monitors (red circles). Concentric circles mark radii of 1.6 km (1 mi, red), 3.2 km (2 mi, yellow), and 6.4 km (4 mi, blue) from the fire location.

Figure 3: Relationship between PM<sub>2.5</sub> concentrations (x axis) and Air Quality Index (AQI) (y axis). Two PM<sub>2.5</sub> vs. AQI relationships from equation 2 are compared to the current US EPA PM<sub>2.5</sub> Air Quality Index.

Figure 4: WRF-AERMOD dispersion model results for the period May 30 – June 12, 2012. (a) 1-h maximum concentration of tire fire smoke ( $\mu\text{g}/\text{m}^3$  PM<sub>2.5</sub>); (b) 24-h maximum concentration of tire fire smoke ( $\mu\text{g}/\text{m}^3$  PM<sub>2.5</sub>); (c) 1-h maximum AQI (p=1); and (d) 24-h maximum AQI (p=1).



## Tables

Table 1: Increment over background for EPA TO-12 and TO-15 VOCs in the tire smoke plume at various measurement sites.

Table 2: Cancer hazard ratios derived from concentrations or emission factors from this work and from other ambient and laboratory combustion studies.

Table 3. Ranked order of acute hazard ratios from multiple studies and unified ranked order list of hazard ratios. Numbers in parentheses are the hazard ratios (see text).

Table 4. Variables necessary for calculation of the multicomponent air quality index (AQI)

Table 5. AQI values ( $p=1$ ) as a function of tire fire  $PM_{2.5}$  smoke concentration and background  $PM_{2.5}$  concentration. Colors correspond to ranges as follows: green 0-50 (good); yellow 51-100 (moderate); orange 101-150 (unhealthy for sensitive groups); red 151-200 (unhealthy); purple 201-300 (very unhealthy); maroon >300 (hazardous). An expanded table with smoke indicators other than  $PM_{2.5}$  (e.g. CO,  $CO_2$ ) can be found in the supplementary material.

Table 6. Recommended steps and detailed actions to respond to a large-scale urban fire.

**Table 1.**

| Species                               | Method detection limit (ppbv) | Method of detection                  | Tire plume <sup>a</sup> ppbv | Background air <sup>b</sup> ppbv | $\Delta$ VOC <sup>c</sup> ppbv | Enhancement over background <sup>e</sup> | Enhancement relative to benzene ( $\Delta$ VOC <sub>i</sub> / $\Delta$ VOC <sub>benzene</sub> ) |
|---------------------------------------|-------------------------------|--------------------------------------|------------------------------|----------------------------------|--------------------------------|------------------------------------------|-------------------------------------------------------------------------------------------------|
| <b>Aromatic</b>                       |                               |                                      |                              |                                  |                                |                                          |                                                                                                 |
| Benzene                               | 0.17                          |                                      | 8.27                         | 0.05                             | 8.22                           | 164                                      | 1                                                                                               |
| Toluene                               | 0.16                          |                                      | 8.64                         | 0.05                             | 8.59                           | 172                                      | 1.0                                                                                             |
| Ethylbenzene                          | 0.18                          |                                      | 0.66                         | <0.18                            | 0.48 <sup>d</sup>              | 3                                        | 1.6E-02                                                                                         |
| m,p Xylene                            | 0.26                          | GCMS volatiles, EPA TO-15            | 2.03                         | <0.26                            | 1.77 <sup>d</sup>              | 7                                        | 4.0E-02                                                                                         |
| o-Xylene                              | 0.11                          |                                      | 0.62                         | <0.11                            | 0.51 <sup>d</sup>              | 5                                        | 2.7E-02                                                                                         |
| Styrene                               | 0.1                           |                                      | 0.59                         | <0.1                             | 0.49 <sup>d</sup>              | 5                                        | 2.9E-02                                                                                         |
| 1,2,4-Trimethylbenzene                | 0.14                          |                                      | 0.27                         | <0.14                            | 0.13 <sup>d</sup>              | 1                                        | 5.4E-03                                                                                         |
| 1,3,5-Trimethylbenzene                | 0.16                          |                                      | 0.14                         | <0.16                            | 0.0                            | 0                                        |                                                                                                 |
| Isopropyl benzene                     | 0.07                          |                                      | 0.6                          | <0.07                            | 0.53 <sup>d</sup>              | 8                                        | 4.4E-02                                                                                         |
| m-ethyltoluene                        | 0.08                          | To-12 Speciated non-Methane Organics | 1.53                         | 0.12                             | 1.41                           | 12                                       | 6.8E-02                                                                                         |
| p-ethyltoluene                        | 0.1                           |                                      | 0.76                         | 0.05                             | 0.71                           | 14                                       | 8.3E-02                                                                                         |
| m-dimethyl benzene                    | 0.05                          |                                      | 0.08                         | <0.05                            | 0.03 <sup>d</sup>              | 1                                        | 3.5E-03                                                                                         |
| p-dimethyl benzene                    | 0.04                          |                                      | 0.49                         | <0.04                            | 0.45 <sup>d</sup>              | 11                                       | 6.5E-02                                                                                         |
| <b>Halocarbon compounds</b>           |                               |                                      |                              |                                  |                                |                                          |                                                                                                 |
| Carbon tetrachloride                  | 0.33                          |                                      | 0.09                         | 0.1                              | 0                              | 0                                        |                                                                                                 |
| Dichlorodifluoromethane               | 0.23                          | GCMS volatiles, EPA TO-15            | 0.53                         | 0.51                             | 0.02                           | 0                                        | 2.3E-04                                                                                         |
| Trichlorofluoromethane                | 0.17                          |                                      | 0.25                         | 0.22                             | 0.03                           | 0                                        | 7.9E-04                                                                                         |
| 1,1,2 Trichloro,1,2,2-trifluoroethane | 0.18                          |                                      | 0.08                         | 0.08                             | 0                              | 0                                        | 0.0E+00                                                                                         |
| <b>Aliphatic compounds</b>            |                               |                                      |                              |                                  |                                |                                          |                                                                                                 |
| Acetylene                             | 0.73                          |                                      | 0.72                         | 0.12                             | 0.6                            | 5                                        | 2.9E-02                                                                                         |
| Propylene                             | 0.16                          | GCMS volatiles, EPA TO-15            | 5.54                         | <0.16                            | 5.38 <sup>d</sup>              | 34                                       | 2.0E-01                                                                                         |
| 1,3 butadiene                         | 0.24                          |                                      | 0.91                         | <0.24                            | 0.67 <sup>d</sup>              | 3                                        | 1.6E-02                                                                                         |
| Ethane                                | 0.03                          |                                      | 41.7                         | 2.5                              | 39.2 <sup>d</sup>              | 16                                       | 9.1E-02                                                                                         |
| propane                               | 0.1                           |                                      | 20.4                         | 0.59                             | 19.81                          | 34                                       | 2.0E-01                                                                                         |
| Butane                                | 0.1                           | To-12 Speciated non-Methane Organics | 6.07                         | 0.29                             | 5.78                           | 20                                       | 1.2E-01                                                                                         |
| Isopentane                            | 0.08                          |                                      | 3.67                         | 0.3                              | 3.37                           | 11                                       | 6.5E-02                                                                                         |
| Hexane                                | 0.18                          |                                      | 1.1                          | 0.08                             | 1.02                           | 13                                       | 7.4E-02                                                                                         |
| Nonane                                | 0.05                          |                                      | 0.37                         | 0.21                             | 0.16                           | 1                                        | 4.4E-03                                                                                         |
| 1-decene                              | 0.08                          |                                      | 2.58                         | 0.15                             | 2.43                           | 16                                       | 9.4E-02                                                                                         |

|                            |      |                                |      |       |                   |    |         |
|----------------------------|------|--------------------------------|------|-------|-------------------|----|---------|
| Decane                     | 0.08 |                                | 1.13 | <0.08 | 1.05 <sup>d</sup> | 13 | 7.6E-02 |
| Dodecane                   | 0.08 |                                | 0.13 | <.08  | 0.05 <sup>d</sup> | 1  | 3.6E-03 |
| <b>Carbonyl compounds</b>  |      |                                |      |       |                   |    |         |
| Acrolein                   | 0.08 | GCMS volatiles,<br>EPA TO-15   | 1.5  | <0.08 | 1.42 <sup>d</sup> | 18 | 1.0E-01 |
| <b>Terpenoid compounds</b> |      |                                |      |       |                   |    |         |
| $\alpha$ -Pinene           | 0.06 | To-12 Speciated<br>non-Methane | 0.08 | 0.1   | 0.02              |    |         |
| Isoprene                   | 0.08 | Organics                       | 2.49 | 0.14  | 2.35              | 17 | 9.8E-02 |

<sup>a</sup>Tire plume sample is based on the VOC canister measurement 300 meters away from fire; <sup>b</sup>Background sample is based on the Iowa Pentacrest (06/01/2012, 15:20); <sup>c</sup>  $\Delta$ VOC is tire plume minus background sample; <sup>d</sup> Minimum detection limit values were used for the calculate of delta;

<sup>e</sup> Enhancement is the ratio of  $\Delta$ VOC over background concentration. For background concentration below MDL, MDL values were substituted for the background.

Table 2:

| CAS Number | Species of Interest        | Unit Risk Factor (URF)                        | EPA Classification | Laboratory open tire fire burn |        |      | Westley Tire Fire                  |                      |      | This study (VOC canister)          |                      |      | This study (emission factors) |                      |      | Pooled Oil Burning        |                      |      |
|------------|----------------------------|-----------------------------------------------|--------------------|--------------------------------|--------|------|------------------------------------|----------------------|------|------------------------------------|----------------------|------|-------------------------------|----------------------|------|---------------------------|----------------------|------|
|            |                            | [( $\mu\text{g}/\text{m}^3$ ) <sup>-1</sup> ] |                    | EF (mg kg <sup>-1</sup> )      | HRC    | Rank | Conc. ( $\mu\text{g}/\text{m}^3$ ) | HRC                  | Rank | Conc. ( $\mu\text{g}/\text{m}^3$ ) | HRC                  | Rank | EF (mg kg <sup>-1</sup> )     | HRC                  | Rank | EF (mg kg <sup>-1</sup> ) | HRC                  | Rank |
|            | PM2.5                      | $3.0 \times 10^{-4}$                          |                    |                                |        |      |                                    |                      |      |                                    |                      |      | 5350                          | 1.6                  | 1    |                           |                      |      |
| 71-43-2    | Benzene                    | $2.9 \times 10^{-5}$                          | A                  | 2205                           | 0.064  | 2    | 9.2                                | $2.7 \times 10^{-4}$ | 1    | 26.4                               | $7.7 \times 10^{-4}$ | 1    |                               |                      |      | 251                       | $7.3 \times 10^{-3}$ | 1    |
| 91-20-3    | Naphthalene <sup>(a)</sup> | $3.4 \times 10^{-5}$                          | C                  | 1195                           | 0.041  | 3    |                                    |                      |      |                                    |                      |      |                               |                      |      |                           |                      |      |
| 106-99-0   | 1,3-Butadiene              | $1.7 \times 10^{-4}$                          | B2                 | 160                            | 0.027  | 3    | 1.1                                | $1.9 \times 10^{-4}$ | 2    | 1.5                                | $2.6 \times 10^{-4}$ | 2    |                               |                      |      |                           |                      |      |
| 100-41-4   | Ethylbenzene               | $2.5 \times 10^{-6}$                          | D                  | 632                            | 0.0016 | 4    |                                    |                      |      | 2.9                                | $7.2 \times 10^{-6}$ | 3    |                               |                      |      | 10                        | $2.5 \times 10^{-5}$ | 4    |
| 50-00-0    | Formaldehyde               | $6.0 \times 10^{-6}$                          | B1                 |                                |        |      |                                    |                      |      |                                    |                      |      |                               |                      |      | 139                       | $8.3 \times 10^{-4}$ | 2    |
| 75-07-0    | Acetaldehyde               | $2.7 \times 10^{-6}$                          | B2                 |                                |        |      |                                    |                      |      |                                    |                      |      |                               |                      |      | 44                        | $1.2 \times 10^{-4}$ | 3    |
| 50-32-8    | Benzo(a) pyrene            | $1.1 \times 10^{-3}$                          | A                  | 113.9                          | 0.13   | 1    | 0.15                               | $1.7 \times 10^{-4}$ | 2    |                                    |                      |      | 3.56                          | $3.9 \times 10^{-3}$ | 2    | 7                         | $7.7 \times 10^{-3}$ | 1    |

(a) Volatile and semi-volatile phase

Table 3

| Study                                                                          |                                                                                                                                           |                                                                               |                         |                           |                                                                                                                                                                                                                                                                                                                                                                                                                                         |                                  |          |                                                         |                                             |                                                                               |                                         |                     |                                                                                                                                                                                                                                                                                                                                                    |                                    |         |                                   |                                          |                                                           |                            |                                                                                                                                                                                                                                                                          |               |                |                |                     |                               |                                    |                                                                                                                                                                                                       |                       |           |          |                |                       |                                                                                                                                                                                                                                                                                                                                                                                                                                                       |                 |    |    |                        |           |                                                           |                               |                                                                                |                            |
|--------------------------------------------------------------------------------|-------------------------------------------------------------------------------------------------------------------------------------------|-------------------------------------------------------------------------------|-------------------------|---------------------------|-----------------------------------------------------------------------------------------------------------------------------------------------------------------------------------------------------------------------------------------------------------------------------------------------------------------------------------------------------------------------------------------------------------------------------------------|----------------------------------|----------|---------------------------------------------------------|---------------------------------------------|-------------------------------------------------------------------------------|-----------------------------------------|---------------------|----------------------------------------------------------------------------------------------------------------------------------------------------------------------------------------------------------------------------------------------------------------------------------------------------------------------------------------------------|------------------------------------|---------|-----------------------------------|------------------------------------------|-----------------------------------------------------------|----------------------------|--------------------------------------------------------------------------------------------------------------------------------------------------------------------------------------------------------------------------------------------------------------------------|---------------|----------------|----------------|---------------------|-------------------------------|------------------------------------|-------------------------------------------------------------------------------------------------------------------------------------------------------------------------------------------------------|-----------------------|-----------|----------|----------------|-----------------------|-------------------------------------------------------------------------------------------------------------------------------------------------------------------------------------------------------------------------------------------------------------------------------------------------------------------------------------------------------------------------------------------------------------------------------------------------------|-----------------|----|----|------------------------|-----------|-----------------------------------------------------------|-------------------------------|--------------------------------------------------------------------------------|----------------------------|
|                                                                                | This study, emission factors                                                                                                              | EPA, emission factors                                                         | Pooled oil burn         | This study, VOC Canisters | Westley, CA                                                                                                                                                                                                                                                                                                                                                                                                                             | Unified Ranking by Hazard Ratio* |          |                                                         |                                             |                                                                               |                                         |                     |                                                                                                                                                                                                                                                                                                                                                    |                                    |         |                                   |                                          |                                                           |                            |                                                                                                                                                                                                                                                                          |               |                |                |                     |                               |                                    |                                                                                                                                                                                                       |                       |           |          |                |                       |                                                                                                                                                                                                                                                                                                                                                                                                                                                       |                 |    |    |                        |           |                                                           |                               |                                                                                |                            |
| Hazard Ratio<br>Higher ↑<br><br>↓ Lower<br>←                                   | <table border="1"> <tr><td>SO<sub>2</sub> (13,500)</td></tr> <tr><td>PM<sub>2.5</sub> (357)</td></tr> <tr><td>BC (138)</td></tr> </table> | SO <sub>2</sub> (13,500)                                                      | PM <sub>2.5</sub> (357) | BC (138)                  | <table border="1"> <tr><td>PM<sub>10</sub> (2980)</td></tr> <tr><td>CO (262)</td></tr> <tr><td>Biphenyl (52), Vinylcyclohexene (49), Benzaldehyde (38)</td></tr> <tr><td>Naphthalene (13), Benzene (15), Phenol (12)</td></tr> <tr><td>Styrene (7.6), Indene (4.8), Ethylbenzene (4.4), Xylenes (3.6), Toluene (3.3)</td></tr> <tr><td>TMB (1.2), Cumene (1.6), Limonene (1.2)</td></tr> <tr><td>1,3-Butadiene (0.1)</td></tr> </table> | PM <sub>10</sub> (2980)          | CO (262) | Biphenyl (52), Vinylcyclohexene (49), Benzaldehyde (38) | Naphthalene (13), Benzene (15), Phenol (12) | Styrene (7.6), Indene (4.8), Ethylbenzene (4.4), Xylenes (3.6), Toluene (3.3) | TMB (1.2), Cumene (1.6), Limonene (1.2) | 1,3-Butadiene (0.1) | <table border="1"> <tr><td>Acrolein (160), Formaldehyde (126)</td></tr> <tr><td>CO (65)</td></tr> <tr><td>Benzaldehyde (2.5), Benzene (1.5)</td></tr> <tr><td>Napthalene (0.6), Isovaleraldehyde (0.3)</td></tr> <tr><td>Acetone (0.04), Xylene (0.04), TMB (0.05), Toluene (0.06)</td></tr> <tr><td>MEK (0.01), Nonane (0.003)</td></tr> </table> | Acrolein (160), Formaldehyde (126) | CO (65) | Benzaldehyde (2.5), Benzene (1.5) | Napthalene (0.6), Isovaleraldehyde (0.3) | Acetone (0.04), Xylene (0.04), TMB (0.05), Toluene (0.06) | MEK (0.01), Nonane (0.003) | <table border="1"> <tr><td>Acrolein (49)</td></tr> <tr><td>Benzene (0.16)</td></tr> <tr><td>Toluene (0.04)</td></tr> <tr><td>Ethylbenzene (0.02)</td></tr> <tr><td>Styrene (0.03), Xylene (0.02)</td></tr> <tr><td>TMB (0.002), 1,3-Butadiene (0.001)</td></tr> </table> | Acrolein (49) | Benzene (0.16) | Toluene (0.04) | Ethylbenzene (0.02) | Styrene (0.03), Xylene (0.02) | TMB (0.002), 1,3-Butadiene (0.001) | <table border="1"> <tr><td>PM<sub>10</sub> (11)</td></tr> <tr><td>BC (0.46)</td></tr> <tr><td>CO (0.5)</td></tr> <tr><td>Benzene (0.06)</td></tr> <tr><td>1,3-Butadiene (&lt;0.01)</td></tr> </table> | PM <sub>10</sub> (11) | BC (0.46) | CO (0.5) | Benzene (0.06) | 1,3-Butadiene (<0.01) | <table border="1"> <tr><td>SO<sub>2</sub></td></tr> <tr><td>PM</td></tr> <tr><td>BC</td></tr> <tr><td>Acrolein, Formaldehyde</td></tr> <tr><td><i>CO</i></td></tr> <tr><td>Benzene, Benzaldehyde, Biphenyl, Vinylcyclohexene, Phenol</td></tr> <tr><td>Naphthalene, Isovaleraldehyde</td></tr> <tr><td>Styrene, Indene, Ethylbenzene, Toluene, Acetone, Xylene, TMB, Cumene, Limonene</td></tr> <tr><td>1,3-Butadiene, MEK, Nonane</td></tr> </table> | SO <sub>2</sub> | PM | BC | Acrolein, Formaldehyde | <i>CO</i> | Benzene, Benzaldehyde, Biphenyl, Vinylcyclohexene, Phenol | Naphthalene, Isovaleraldehyde | Styrene, Indene, Ethylbenzene, Toluene, Acetone, Xylene, TMB, Cumene, Limonene | 1,3-Butadiene, MEK, Nonane |
|                                                                                |                                                                                                                                           | SO <sub>2</sub> (13,500)                                                      |                         |                           |                                                                                                                                                                                                                                                                                                                                                                                                                                         |                                  |          |                                                         |                                             |                                                                               |                                         |                     |                                                                                                                                                                                                                                                                                                                                                    |                                    |         |                                   |                                          |                                                           |                            |                                                                                                                                                                                                                                                                          |               |                |                |                     |                               |                                    |                                                                                                                                                                                                       |                       |           |          |                |                       |                                                                                                                                                                                                                                                                                                                                                                                                                                                       |                 |    |    |                        |           |                                                           |                               |                                                                                |                            |
|                                                                                |                                                                                                                                           | PM <sub>2.5</sub> (357)                                                       |                         |                           |                                                                                                                                                                                                                                                                                                                                                                                                                                         |                                  |          |                                                         |                                             |                                                                               |                                         |                     |                                                                                                                                                                                                                                                                                                                                                    |                                    |         |                                   |                                          |                                                           |                            |                                                                                                                                                                                                                                                                          |               |                |                |                     |                               |                                    |                                                                                                                                                                                                       |                       |           |          |                |                       |                                                                                                                                                                                                                                                                                                                                                                                                                                                       |                 |    |    |                        |           |                                                           |                               |                                                                                |                            |
|                                                                                |                                                                                                                                           | BC (138)                                                                      |                         |                           |                                                                                                                                                                                                                                                                                                                                                                                                                                         |                                  |          |                                                         |                                             |                                                                               |                                         |                     |                                                                                                                                                                                                                                                                                                                                                    |                                    |         |                                   |                                          |                                                           |                            |                                                                                                                                                                                                                                                                          |               |                |                |                     |                               |                                    |                                                                                                                                                                                                       |                       |           |          |                |                       |                                                                                                                                                                                                                                                                                                                                                                                                                                                       |                 |    |    |                        |           |                                                           |                               |                                                                                |                            |
|                                                                                |                                                                                                                                           | PM <sub>10</sub> (2980)                                                       |                         |                           |                                                                                                                                                                                                                                                                                                                                                                                                                                         |                                  |          |                                                         |                                             |                                                                               |                                         |                     |                                                                                                                                                                                                                                                                                                                                                    |                                    |         |                                   |                                          |                                                           |                            |                                                                                                                                                                                                                                                                          |               |                |                |                     |                               |                                    |                                                                                                                                                                                                       |                       |           |          |                |                       |                                                                                                                                                                                                                                                                                                                                                                                                                                                       |                 |    |    |                        |           |                                                           |                               |                                                                                |                            |
|                                                                                |                                                                                                                                           | CO (262)                                                                      |                         |                           |                                                                                                                                                                                                                                                                                                                                                                                                                                         |                                  |          |                                                         |                                             |                                                                               |                                         |                     |                                                                                                                                                                                                                                                                                                                                                    |                                    |         |                                   |                                          |                                                           |                            |                                                                                                                                                                                                                                                                          |               |                |                |                     |                               |                                    |                                                                                                                                                                                                       |                       |           |          |                |                       |                                                                                                                                                                                                                                                                                                                                                                                                                                                       |                 |    |    |                        |           |                                                           |                               |                                                                                |                            |
|                                                                                |                                                                                                                                           | Biphenyl (52), Vinylcyclohexene (49), Benzaldehyde (38)                       |                         |                           |                                                                                                                                                                                                                                                                                                                                                                                                                                         |                                  |          |                                                         |                                             |                                                                               |                                         |                     |                                                                                                                                                                                                                                                                                                                                                    |                                    |         |                                   |                                          |                                                           |                            |                                                                                                                                                                                                                                                                          |               |                |                |                     |                               |                                    |                                                                                                                                                                                                       |                       |           |          |                |                       |                                                                                                                                                                                                                                                                                                                                                                                                                                                       |                 |    |    |                        |           |                                                           |                               |                                                                                |                            |
|                                                                                |                                                                                                                                           | Naphthalene (13), Benzene (15), Phenol (12)                                   |                         |                           |                                                                                                                                                                                                                                                                                                                                                                                                                                         |                                  |          |                                                         |                                             |                                                                               |                                         |                     |                                                                                                                                                                                                                                                                                                                                                    |                                    |         |                                   |                                          |                                                           |                            |                                                                                                                                                                                                                                                                          |               |                |                |                     |                               |                                    |                                                                                                                                                                                                       |                       |           |          |                |                       |                                                                                                                                                                                                                                                                                                                                                                                                                                                       |                 |    |    |                        |           |                                                           |                               |                                                                                |                            |
|                                                                                |                                                                                                                                           | Styrene (7.6), Indene (4.8), Ethylbenzene (4.4), Xylenes (3.6), Toluene (3.3) |                         |                           |                                                                                                                                                                                                                                                                                                                                                                                                                                         |                                  |          |                                                         |                                             |                                                                               |                                         |                     |                                                                                                                                                                                                                                                                                                                                                    |                                    |         |                                   |                                          |                                                           |                            |                                                                                                                                                                                                                                                                          |               |                |                |                     |                               |                                    |                                                                                                                                                                                                       |                       |           |          |                |                       |                                                                                                                                                                                                                                                                                                                                                                                                                                                       |                 |    |    |                        |           |                                                           |                               |                                                                                |                            |
|                                                                                |                                                                                                                                           | TMB (1.2), Cumene (1.6), Limonene (1.2)                                       |                         |                           |                                                                                                                                                                                                                                                                                                                                                                                                                                         |                                  |          |                                                         |                                             |                                                                               |                                         |                     |                                                                                                                                                                                                                                                                                                                                                    |                                    |         |                                   |                                          |                                                           |                            |                                                                                                                                                                                                                                                                          |               |                |                |                     |                               |                                    |                                                                                                                                                                                                       |                       |           |          |                |                       |                                                                                                                                                                                                                                                                                                                                                                                                                                                       |                 |    |    |                        |           |                                                           |                               |                                                                                |                            |
| 1,3-Butadiene (0.1)                                                            |                                                                                                                                           |                                                                               |                         |                           |                                                                                                                                                                                                                                                                                                                                                                                                                                         |                                  |          |                                                         |                                             |                                                                               |                                         |                     |                                                                                                                                                                                                                                                                                                                                                    |                                    |         |                                   |                                          |                                                           |                            |                                                                                                                                                                                                                                                                          |               |                |                |                     |                               |                                    |                                                                                                                                                                                                       |                       |           |          |                |                       |                                                                                                                                                                                                                                                                                                                                                                                                                                                       |                 |    |    |                        |           |                                                           |                               |                                                                                |                            |
| Acrolein (160), Formaldehyde (126)                                             |                                                                                                                                           |                                                                               |                         |                           |                                                                                                                                                                                                                                                                                                                                                                                                                                         |                                  |          |                                                         |                                             |                                                                               |                                         |                     |                                                                                                                                                                                                                                                                                                                                                    |                                    |         |                                   |                                          |                                                           |                            |                                                                                                                                                                                                                                                                          |               |                |                |                     |                               |                                    |                                                                                                                                                                                                       |                       |           |          |                |                       |                                                                                                                                                                                                                                                                                                                                                                                                                                                       |                 |    |    |                        |           |                                                           |                               |                                                                                |                            |
| CO (65)                                                                        |                                                                                                                                           |                                                                               |                         |                           |                                                                                                                                                                                                                                                                                                                                                                                                                                         |                                  |          |                                                         |                                             |                                                                               |                                         |                     |                                                                                                                                                                                                                                                                                                                                                    |                                    |         |                                   |                                          |                                                           |                            |                                                                                                                                                                                                                                                                          |               |                |                |                     |                               |                                    |                                                                                                                                                                                                       |                       |           |          |                |                       |                                                                                                                                                                                                                                                                                                                                                                                                                                                       |                 |    |    |                        |           |                                                           |                               |                                                                                |                            |
| Benzaldehyde (2.5), Benzene (1.5)                                              |                                                                                                                                           |                                                                               |                         |                           |                                                                                                                                                                                                                                                                                                                                                                                                                                         |                                  |          |                                                         |                                             |                                                                               |                                         |                     |                                                                                                                                                                                                                                                                                                                                                    |                                    |         |                                   |                                          |                                                           |                            |                                                                                                                                                                                                                                                                          |               |                |                |                     |                               |                                    |                                                                                                                                                                                                       |                       |           |          |                |                       |                                                                                                                                                                                                                                                                                                                                                                                                                                                       |                 |    |    |                        |           |                                                           |                               |                                                                                |                            |
| Napthalene (0.6), Isovaleraldehyde (0.3)                                       |                                                                                                                                           |                                                                               |                         |                           |                                                                                                                                                                                                                                                                                                                                                                                                                                         |                                  |          |                                                         |                                             |                                                                               |                                         |                     |                                                                                                                                                                                                                                                                                                                                                    |                                    |         |                                   |                                          |                                                           |                            |                                                                                                                                                                                                                                                                          |               |                |                |                     |                               |                                    |                                                                                                                                                                                                       |                       |           |          |                |                       |                                                                                                                                                                                                                                                                                                                                                                                                                                                       |                 |    |    |                        |           |                                                           |                               |                                                                                |                            |
| Acetone (0.04), Xylene (0.04), TMB (0.05), Toluene (0.06)                      |                                                                                                                                           |                                                                               |                         |                           |                                                                                                                                                                                                                                                                                                                                                                                                                                         |                                  |          |                                                         |                                             |                                                                               |                                         |                     |                                                                                                                                                                                                                                                                                                                                                    |                                    |         |                                   |                                          |                                                           |                            |                                                                                                                                                                                                                                                                          |               |                |                |                     |                               |                                    |                                                                                                                                                                                                       |                       |           |          |                |                       |                                                                                                                                                                                                                                                                                                                                                                                                                                                       |                 |    |    |                        |           |                                                           |                               |                                                                                |                            |
| MEK (0.01), Nonane (0.003)                                                     |                                                                                                                                           |                                                                               |                         |                           |                                                                                                                                                                                                                                                                                                                                                                                                                                         |                                  |          |                                                         |                                             |                                                                               |                                         |                     |                                                                                                                                                                                                                                                                                                                                                    |                                    |         |                                   |                                          |                                                           |                            |                                                                                                                                                                                                                                                                          |               |                |                |                     |                               |                                    |                                                                                                                                                                                                       |                       |           |          |                |                       |                                                                                                                                                                                                                                                                                                                                                                                                                                                       |                 |    |    |                        |           |                                                           |                               |                                                                                |                            |
| Acrolein (49)                                                                  |                                                                                                                                           |                                                                               |                         |                           |                                                                                                                                                                                                                                                                                                                                                                                                                                         |                                  |          |                                                         |                                             |                                                                               |                                         |                     |                                                                                                                                                                                                                                                                                                                                                    |                                    |         |                                   |                                          |                                                           |                            |                                                                                                                                                                                                                                                                          |               |                |                |                     |                               |                                    |                                                                                                                                                                                                       |                       |           |          |                |                       |                                                                                                                                                                                                                                                                                                                                                                                                                                                       |                 |    |    |                        |           |                                                           |                               |                                                                                |                            |
| Benzene (0.16)                                                                 |                                                                                                                                           |                                                                               |                         |                           |                                                                                                                                                                                                                                                                                                                                                                                                                                         |                                  |          |                                                         |                                             |                                                                               |                                         |                     |                                                                                                                                                                                                                                                                                                                                                    |                                    |         |                                   |                                          |                                                           |                            |                                                                                                                                                                                                                                                                          |               |                |                |                     |                               |                                    |                                                                                                                                                                                                       |                       |           |          |                |                       |                                                                                                                                                                                                                                                                                                                                                                                                                                                       |                 |    |    |                        |           |                                                           |                               |                                                                                |                            |
| Toluene (0.04)                                                                 |                                                                                                                                           |                                                                               |                         |                           |                                                                                                                                                                                                                                                                                                                                                                                                                                         |                                  |          |                                                         |                                             |                                                                               |                                         |                     |                                                                                                                                                                                                                                                                                                                                                    |                                    |         |                                   |                                          |                                                           |                            |                                                                                                                                                                                                                                                                          |               |                |                |                     |                               |                                    |                                                                                                                                                                                                       |                       |           |          |                |                       |                                                                                                                                                                                                                                                                                                                                                                                                                                                       |                 |    |    |                        |           |                                                           |                               |                                                                                |                            |
| Ethylbenzene (0.02)                                                            |                                                                                                                                           |                                                                               |                         |                           |                                                                                                                                                                                                                                                                                                                                                                                                                                         |                                  |          |                                                         |                                             |                                                                               |                                         |                     |                                                                                                                                                                                                                                                                                                                                                    |                                    |         |                                   |                                          |                                                           |                            |                                                                                                                                                                                                                                                                          |               |                |                |                     |                               |                                    |                                                                                                                                                                                                       |                       |           |          |                |                       |                                                                                                                                                                                                                                                                                                                                                                                                                                                       |                 |    |    |                        |           |                                                           |                               |                                                                                |                            |
| Styrene (0.03), Xylene (0.02)                                                  |                                                                                                                                           |                                                                               |                         |                           |                                                                                                                                                                                                                                                                                                                                                                                                                                         |                                  |          |                                                         |                                             |                                                                               |                                         |                     |                                                                                                                                                                                                                                                                                                                                                    |                                    |         |                                   |                                          |                                                           |                            |                                                                                                                                                                                                                                                                          |               |                |                |                     |                               |                                    |                                                                                                                                                                                                       |                       |           |          |                |                       |                                                                                                                                                                                                                                                                                                                                                                                                                                                       |                 |    |    |                        |           |                                                           |                               |                                                                                |                            |
| TMB (0.002), 1,3-Butadiene (0.001)                                             |                                                                                                                                           |                                                                               |                         |                           |                                                                                                                                                                                                                                                                                                                                                                                                                                         |                                  |          |                                                         |                                             |                                                                               |                                         |                     |                                                                                                                                                                                                                                                                                                                                                    |                                    |         |                                   |                                          |                                                           |                            |                                                                                                                                                                                                                                                                          |               |                |                |                     |                               |                                    |                                                                                                                                                                                                       |                       |           |          |                |                       |                                                                                                                                                                                                                                                                                                                                                                                                                                                       |                 |    |    |                        |           |                                                           |                               |                                                                                |                            |
| PM <sub>10</sub> (11)                                                          |                                                                                                                                           |                                                                               |                         |                           |                                                                                                                                                                                                                                                                                                                                                                                                                                         |                                  |          |                                                         |                                             |                                                                               |                                         |                     |                                                                                                                                                                                                                                                                                                                                                    |                                    |         |                                   |                                          |                                                           |                            |                                                                                                                                                                                                                                                                          |               |                |                |                     |                               |                                    |                                                                                                                                                                                                       |                       |           |          |                |                       |                                                                                                                                                                                                                                                                                                                                                                                                                                                       |                 |    |    |                        |           |                                                           |                               |                                                                                |                            |
| BC (0.46)                                                                      |                                                                                                                                           |                                                                               |                         |                           |                                                                                                                                                                                                                                                                                                                                                                                                                                         |                                  |          |                                                         |                                             |                                                                               |                                         |                     |                                                                                                                                                                                                                                                                                                                                                    |                                    |         |                                   |                                          |                                                           |                            |                                                                                                                                                                                                                                                                          |               |                |                |                     |                               |                                    |                                                                                                                                                                                                       |                       |           |          |                |                       |                                                                                                                                                                                                                                                                                                                                                                                                                                                       |                 |    |    |                        |           |                                                           |                               |                                                                                |                            |
| CO (0.5)                                                                       |                                                                                                                                           |                                                                               |                         |                           |                                                                                                                                                                                                                                                                                                                                                                                                                                         |                                  |          |                                                         |                                             |                                                                               |                                         |                     |                                                                                                                                                                                                                                                                                                                                                    |                                    |         |                                   |                                          |                                                           |                            |                                                                                                                                                                                                                                                                          |               |                |                |                     |                               |                                    |                                                                                                                                                                                                       |                       |           |          |                |                       |                                                                                                                                                                                                                                                                                                                                                                                                                                                       |                 |    |    |                        |           |                                                           |                               |                                                                                |                            |
| Benzene (0.06)                                                                 |                                                                                                                                           |                                                                               |                         |                           |                                                                                                                                                                                                                                                                                                                                                                                                                                         |                                  |          |                                                         |                                             |                                                                               |                                         |                     |                                                                                                                                                                                                                                                                                                                                                    |                                    |         |                                   |                                          |                                                           |                            |                                                                                                                                                                                                                                                                          |               |                |                |                     |                               |                                    |                                                                                                                                                                                                       |                       |           |          |                |                       |                                                                                                                                                                                                                                                                                                                                                                                                                                                       |                 |    |    |                        |           |                                                           |                               |                                                                                |                            |
| 1,3-Butadiene (<0.01)                                                          |                                                                                                                                           |                                                                               |                         |                           |                                                                                                                                                                                                                                                                                                                                                                                                                                         |                                  |          |                                                         |                                             |                                                                               |                                         |                     |                                                                                                                                                                                                                                                                                                                                                    |                                    |         |                                   |                                          |                                                           |                            |                                                                                                                                                                                                                                                                          |               |                |                |                     |                               |                                    |                                                                                                                                                                                                       |                       |           |          |                |                       |                                                                                                                                                                                                                                                                                                                                                                                                                                                       |                 |    |    |                        |           |                                                           |                               |                                                                                |                            |
| SO <sub>2</sub>                                                                |                                                                                                                                           |                                                                               |                         |                           |                                                                                                                                                                                                                                                                                                                                                                                                                                         |                                  |          |                                                         |                                             |                                                                               |                                         |                     |                                                                                                                                                                                                                                                                                                                                                    |                                    |         |                                   |                                          |                                                           |                            |                                                                                                                                                                                                                                                                          |               |                |                |                     |                               |                                    |                                                                                                                                                                                                       |                       |           |          |                |                       |                                                                                                                                                                                                                                                                                                                                                                                                                                                       |                 |    |    |                        |           |                                                           |                               |                                                                                |                            |
| PM                                                                             |                                                                                                                                           |                                                                               |                         |                           |                                                                                                                                                                                                                                                                                                                                                                                                                                         |                                  |          |                                                         |                                             |                                                                               |                                         |                     |                                                                                                                                                                                                                                                                                                                                                    |                                    |         |                                   |                                          |                                                           |                            |                                                                                                                                                                                                                                                                          |               |                |                |                     |                               |                                    |                                                                                                                                                                                                       |                       |           |          |                |                       |                                                                                                                                                                                                                                                                                                                                                                                                                                                       |                 |    |    |                        |           |                                                           |                               |                                                                                |                            |
| BC                                                                             |                                                                                                                                           |                                                                               |                         |                           |                                                                                                                                                                                                                                                                                                                                                                                                                                         |                                  |          |                                                         |                                             |                                                                               |                                         |                     |                                                                                                                                                                                                                                                                                                                                                    |                                    |         |                                   |                                          |                                                           |                            |                                                                                                                                                                                                                                                                          |               |                |                |                     |                               |                                    |                                                                                                                                                                                                       |                       |           |          |                |                       |                                                                                                                                                                                                                                                                                                                                                                                                                                                       |                 |    |    |                        |           |                                                           |                               |                                                                                |                            |
| Acrolein, Formaldehyde                                                         |                                                                                                                                           |                                                                               |                         |                           |                                                                                                                                                                                                                                                                                                                                                                                                                                         |                                  |          |                                                         |                                             |                                                                               |                                         |                     |                                                                                                                                                                                                                                                                                                                                                    |                                    |         |                                   |                                          |                                                           |                            |                                                                                                                                                                                                                                                                          |               |                |                |                     |                               |                                    |                                                                                                                                                                                                       |                       |           |          |                |                       |                                                                                                                                                                                                                                                                                                                                                                                                                                                       |                 |    |    |                        |           |                                                           |                               |                                                                                |                            |
| <i>CO</i>                                                                      |                                                                                                                                           |                                                                               |                         |                           |                                                                                                                                                                                                                                                                                                                                                                                                                                         |                                  |          |                                                         |                                             |                                                                               |                                         |                     |                                                                                                                                                                                                                                                                                                                                                    |                                    |         |                                   |                                          |                                                           |                            |                                                                                                                                                                                                                                                                          |               |                |                |                     |                               |                                    |                                                                                                                                                                                                       |                       |           |          |                |                       |                                                                                                                                                                                                                                                                                                                                                                                                                                                       |                 |    |    |                        |           |                                                           |                               |                                                                                |                            |
| Benzene, Benzaldehyde, Biphenyl, Vinylcyclohexene, Phenol                      |                                                                                                                                           |                                                                               |                         |                           |                                                                                                                                                                                                                                                                                                                                                                                                                                         |                                  |          |                                                         |                                             |                                                                               |                                         |                     |                                                                                                                                                                                                                                                                                                                                                    |                                    |         |                                   |                                          |                                                           |                            |                                                                                                                                                                                                                                                                          |               |                |                |                     |                               |                                    |                                                                                                                                                                                                       |                       |           |          |                |                       |                                                                                                                                                                                                                                                                                                                                                                                                                                                       |                 |    |    |                        |           |                                                           |                               |                                                                                |                            |
| Naphthalene, Isovaleraldehyde                                                  |                                                                                                                                           |                                                                               |                         |                           |                                                                                                                                                                                                                                                                                                                                                                                                                                         |                                  |          |                                                         |                                             |                                                                               |                                         |                     |                                                                                                                                                                                                                                                                                                                                                    |                                    |         |                                   |                                          |                                                           |                            |                                                                                                                                                                                                                                                                          |               |                |                |                     |                               |                                    |                                                                                                                                                                                                       |                       |           |          |                |                       |                                                                                                                                                                                                                                                                                                                                                                                                                                                       |                 |    |    |                        |           |                                                           |                               |                                                                                |                            |
| Styrene, Indene, Ethylbenzene, Toluene, Acetone, Xylene, TMB, Cumene, Limonene |                                                                                                                                           |                                                                               |                         |                           |                                                                                                                                                                                                                                                                                                                                                                                                                                         |                                  |          |                                                         |                                             |                                                                               |                                         |                     |                                                                                                                                                                                                                                                                                                                                                    |                                    |         |                                   |                                          |                                                           |                            |                                                                                                                                                                                                                                                                          |               |                |                |                     |                               |                                    |                                                                                                                                                                                                       |                       |           |          |                |                       |                                                                                                                                                                                                                                                                                                                                                                                                                                                       |                 |    |    |                        |           |                                                           |                               |                                                                                |                            |
| 1,3-Butadiene, MEK, Nonane                                                     |                                                                                                                                           |                                                                               |                         |                           |                                                                                                                                                                                                                                                                                                                                                                                                                                         |                                  |          |                                                         |                                             |                                                                               |                                         |                     |                                                                                                                                                                                                                                                                                                                                                    |                                    |         |                                   |                                          |                                                           |                            |                                                                                                                                                                                                                                                                          |               |                |                |                     |                               |                                    |                                                                                                                                                                                                       |                       |           |          |                |                       |                                                                                                                                                                                                                                                                                                                                                                                                                                                       |                 |    |    |                        |           |                                                           |                               |                                                                                |                            |

\*In the unified list (rightmost column), regular typeface indicates respiratory irritation or reduced lung function as part of the acute effect; italic typeface indicates that respiratory irritation or reduced lung function is NOT part of the acute effect. This is the case only for carbon monoxide.

Table 4.

| Species                | EF <sub>i</sub> /EF <sub>t</sub> | Concentration* for an individual pollutant AQI of 100 |        |        | Method**  | Fraction of total AQI at 100 µg/m <sup>3</sup> , p=1, 1 h |
|------------------------|----------------------------------|-------------------------------------------------------|--------|--------|-----------|-----------------------------------------------------------|
|                        |                                  | 1 h                                                   | 8 h    | 24 h   |           |                                                           |
| PM <sub>2.5</sub>      | 1.0                              | 88                                                    | 50     | 35     | NAAQS     | 0.71                                                      |
| SO <sub>2</sub>        | 1.33                             | 0.075                                                 | 0.075  | 0.075  | NAAQS     | 0.282                                                     |
| Acrolein               | 0.0021                           | 0.0112                                                | 0.0112 | 0.0112 | AEGL      | 0.0035                                                    |
| Formaldehyde           | 0.026                            | 0.34                                                  | 0.34   | 0.34   | AEGL      | 0.00273                                                   |
| Benzene                | 0.41                             | 19.5                                                  | 3.4    | 3.4    | AEGL      | 0.00167                                                   |
| Vinylcyclohexene       | 0.021                            | 0.186                                                 | 0.186  | 0.186  | est. STEL | 0.00107                                                   |
| Benzaldehyde           | 0.124                            | 1.50                                                  | 1.50   | 1.50   | STEL      | 0.00083                                                   |
| Biphenyl               | 0.062                            | 0.96                                                  | 0.44   | 0.44   | AEGL      | 0.00097                                                   |
| Phenol                 | 0.133                            | 5.6                                                   | 2.36   | 2.36   | AEGL      | 0.00064                                                   |
| Naphthalene            | 0.223                            | 5.6                                                   | 5.6    | 5.6    | STEL      | 0.00033                                                   |
| Styrene                | 0.121                            | 7.5                                                   | 7.5    | 7.5    | AEGL      | 0.00016                                                   |
| Indene                 | 0.063                            | 5.6                                                   | 5.6    | 5.6    | STEL      | 0.00010                                                   |
| Ethyl benzene          | 0.118                            | 12.4                                                  | 12.4   | 12.4   | AEGL      | 9.58E-05                                                  |
| 1,2,4-Trimethylbenzene | 0.154                            | 52                                                    | 16.9   | 16.9   | AEGL      | 8.11E-05                                                  |
| Xylene, mixed          | 0.38                             | 49                                                    | 49     | 49     | AEGL      | 7.74E-05                                                  |
| Toluene                | 0.47                             | 75                                                    | 75     | 75     | AEGL      | 7.26E-05                                                  |
| Limonene               | 0.61                             | 187                                                   | 187    | 187    | est. STEL | 2.53E-05                                                  |
| Cumene                 | 0.074                            | 18.7                                                  | 18.7   | 18.7   | AEGL      | 3.52E-05                                                  |
| Acetaldehyde           | 0.0060                           | 16.9                                                  | 16.9   | 16.9   | AEGL      | 8.57E-06                                                  |
| Isovaleraldehyde       | 0.00093                          | 2.47                                                  | 2.47   | 2.47   | est. STEL | 4.67E-06                                                  |
| 1,3-Butadiene          | 0.0299                           | 251                                                   | 251    | 251    | AEGL      | 2.34E-06                                                  |
| Acetone                | 0.0037                           | 75                                                    | 75     | 75     | AEGL      | 9.14E-07                                                  |
| Methyl ethyl ketone    | 0.0013                           | 75                                                    | 75     | 75     | AEGL      | 2.58E-07                                                  |
| Nonane                 | 0.0024                           | 375                                                   | 375    | 375    | est. STEL | 5.38E-08                                                  |
| Hydrogen sulfide       | 0.22 <sup>†</sup>                | 0.19                                                  | 0.12   | 0.12   | AEGL      | 0.05                                                      |

\*Units are µg/m<sup>3</sup> for PM<sub>2.5</sub>, and ppm for all other entries

\*\*est. STEL indicates the AQI breakpoints were based on the SO<sub>2</sub> breakpoints scaled to the ratio of the SO<sub>2</sub> STEL to an estimated species STEL (5 times TLV-TWA)

†H<sub>2</sub>S was not included in the reported AQI in this work because of the high uncertainty on its presence in the smoke. The 0.22 emission ratio is based on a single H<sub>2</sub>S/CO reading detected downwind of a tire fire. See text for discussion.

Table 5.

|                                                       |     | 1hr Avg. Background PM2.5 ( $\mu\text{g}/\text{m}^3$ ) |                 |     |     |     |     |
|-------------------------------------------------------|-----|--------------------------------------------------------|-----------------|-----|-----|-----|-----|
|                                                       |     | 0                                                      | 10              | 20  | 30  | 40  | 50  |
| 1hr Avg. Tire Fire PM2.5 ( $\mu\text{g}/\text{m}^3$ ) | 0   | 0                                                      | 13              | 26  | 39  | 52  | 62  |
|                                                       | 1   | 2                                                      | 15              | 28  | 42  | 54  | 64  |
|                                                       | 2   | 4                                                      | 17              | 30  | 44  | 55  | 65  |
|                                                       | 3   | 6                                                      | 19              | 33  | 46  | 57  | 67  |
|                                                       | 4   | 8                                                      | 21              | 35  | 48  | 59  | 69  |
|                                                       | 5   | 10                                                     | 23              | 37  | 50  | 61  | 71  |
|                                                       | 10  | 21                                                     | 34              | 47  | 59  | 69  | 79  |
|                                                       | 20  | 41                                                     | 54 <sup>b</sup> | 67  | 77  | 87  | 97  |
|                                                       | 30  | 62                                                     | 74 <sup>a</sup> | 84  | 94  | 104 | 114 |
|                                                       | 50  | 99                                                     | 109             | 119 | 129 | 139 | 149 |
|                                                       | 100 | 184                                                    | 194             | 204 | 214 | 222 | 225 |
|                                                       | 200 | 281                                                    | 284             | 286 | 288 | 291 | 293 |
|                                                       | 300 | 330                                                    | 333             | 335 | 337 | 340 | 342 |

|                                                       |     | 8hr Avg. Background PM2.5 ( $\mu\text{g}/\text{m}^3$ ) |                  |     |     |     |     |
|-------------------------------------------------------|-----|--------------------------------------------------------|------------------|-----|-----|-----|-----|
|                                                       |     | 0                                                      | 10               | 20  | 30  | 40  | 50  |
| 8hr Avg. Tire Fire PM2.5 ( $\mu\text{g}/\text{m}^3$ ) | 0   | 0                                                      | 23               | 45  | 64  | 82  | 100 |
|                                                       | 1   | 3                                                      | 26               | 48  | 67  | 85  | 102 |
|                                                       | 2   | 6                                                      | 29               | 52  | 69  | 87  | 105 |
|                                                       | 3   | 9                                                      | 32               | 54  | 72  | 90  | 107 |
|                                                       | 4   | 12                                                     | 35               | 57  | 74  | 92  | 110 |
|                                                       | 5   | 15                                                     | 38               | 59  | 77  | 95  | 112 |
|                                                       | 10  | 30                                                     | 53               | 72  | 90  | 108 | 125 |
|                                                       | 20  | 61                                                     | 79               | 97  | 115 | 132 | 150 |
|                                                       | 30  | 87                                                     | 105 <sup>c</sup> | 123 | 140 | 157 | 173 |
|                                                       | 50  | 138                                                    | 155              | 172 | 188 | 192 | 196 |
|                                                       | 100 | 231                                                    | 235              | 239 | 244 | 248 | 252 |
|                                                       | 200 | 318                                                    | 328              | 338 | 348 | 358 | 368 |
|                                                       | 300 | 444                                                    | 449              | 454 | 459 | 465 | 470 |

|                                                        |     | 24hr Avg. Background PM2.5 ( $\mu\text{g}/\text{m}^3$ ) |                 |     |     |     |     |
|--------------------------------------------------------|-----|---------------------------------------------------------|-----------------|-----|-----|-----|-----|
|                                                        |     | 0                                                       | 10              | 20  | 30  | 40  | 50  |
| 24hr Avg. Tire Fire PM2.5 ( $\mu\text{g}/\text{m}^3$ ) | 0   | 0                                                       | 42 <sup>a</sup> | 67  | 88  | 112 | 137 |
|                                                        | 1   | 5                                                       | 47              | 70  | 91  | 115 | 140 |
|                                                        | 2   | 10                                                      | 52 <sup>e</sup> | 73  | 94  | 118 | 143 |
|                                                        | 3   | 15                                                      | 54              | 76  | 97  | 121 | 146 |
|                                                        | 4   | 20                                                      | 57              | 79  | 100 | 125 | 150 |
|                                                        | 5   | 25                                                      | 60              | 82  | 103 | 128 | 153 |
|                                                        | 10  | 49                                                      | 75 <sup>d</sup> | 96  | 119 | 144 | 160 |
|                                                        | 20  | 82                                                      | 104             | 127 | 152 | 167 | 173 |
|                                                        | 30  | 111                                                     | 134             | 159 | 175 | 180 | 186 |
|                                                        | 50  | 174                                                     | 190             | 195 | 201 | 206 | 211 |
|                                                        | 100 | 246                                                     | 251             | 257 | 262 | 267 | 272 |
|                                                        | 200 | 368                                                     | 378             | 388 | 398 | 408 | 418 |
|                                                        | 300 | 494                                                     | 504             | 514 | 524 | 534 | 544 |

<sup>a</sup>Cell corresponding to the most exposed 1h period at the Hoover site (measurements)

<sup>b</sup>Cell corresponding to the most exposed 1h period at IA-AMS (measurements)

<sup>c</sup>Cell corresponding to the most exposed 8h period at the Hoover site (measurements)

<sup>d</sup>Cell corresponding to the most exposed 24h period at the Hoover site (measurements)

<sup>e</sup>Cell corresponding to the most exposed 24h period at IA-AMS (dispersion model)



Table 6 .

| <b>Step</b> | <b>Detailed Actions</b>                                                                                                                                                                                                                                                                                                                                                                                                                                                                                                                                            |
|-------------|--------------------------------------------------------------------------------------------------------------------------------------------------------------------------------------------------------------------------------------------------------------------------------------------------------------------------------------------------------------------------------------------------------------------------------------------------------------------------------------------------------------------------------------------------------------------|
| Prepare     | <ul style="list-style-type: none"> <li>• Practice multi-agency response</li> <li>• Map important sites and monitor placement</li> <li>• Establish how monitors will be obtained and operated</li> </ul>                                                                                                                                                                                                                                                                                                                                                            |
| Monitor     | <ul style="list-style-type: none"> <li>• <b>HIGHER PRIORITY:</b> Monitor 1-hr PM<sub>2.5</sub>, SO<sub>2</sub>, CO, black carbon, or PM<sub>10</sub> 1-3 km from source in populated areas. <i>These data can be used to assess population exposure, evaluate smoke intensity, calculate AQI values, and allow for dispersion model calibration.</i></li> <li>• <b>LOWER PRIORITY:</b> Monitor above &lt; 1 km from source (see text); Collect samples for VOC analysis (see text); 24-hr monitoring (see text); particulate matter chemical speciation</li> </ul> |
| Model       | <ul style="list-style-type: none"> <li>• Forecast plume intensity, position, and AQI using AERMOD or equivalent</li> <li>• Adjust emission rates using monitoring data</li> </ul>                                                                                                                                                                                                                                                                                                                                                                                  |
| Interpret   | <ul style="list-style-type: none"> <li>• Calculate AQI</li> <li>• Issue public health statements</li> </ul>                                                                                                                                                                                                                                                                                                                                                                                                                                                        |

1  
2

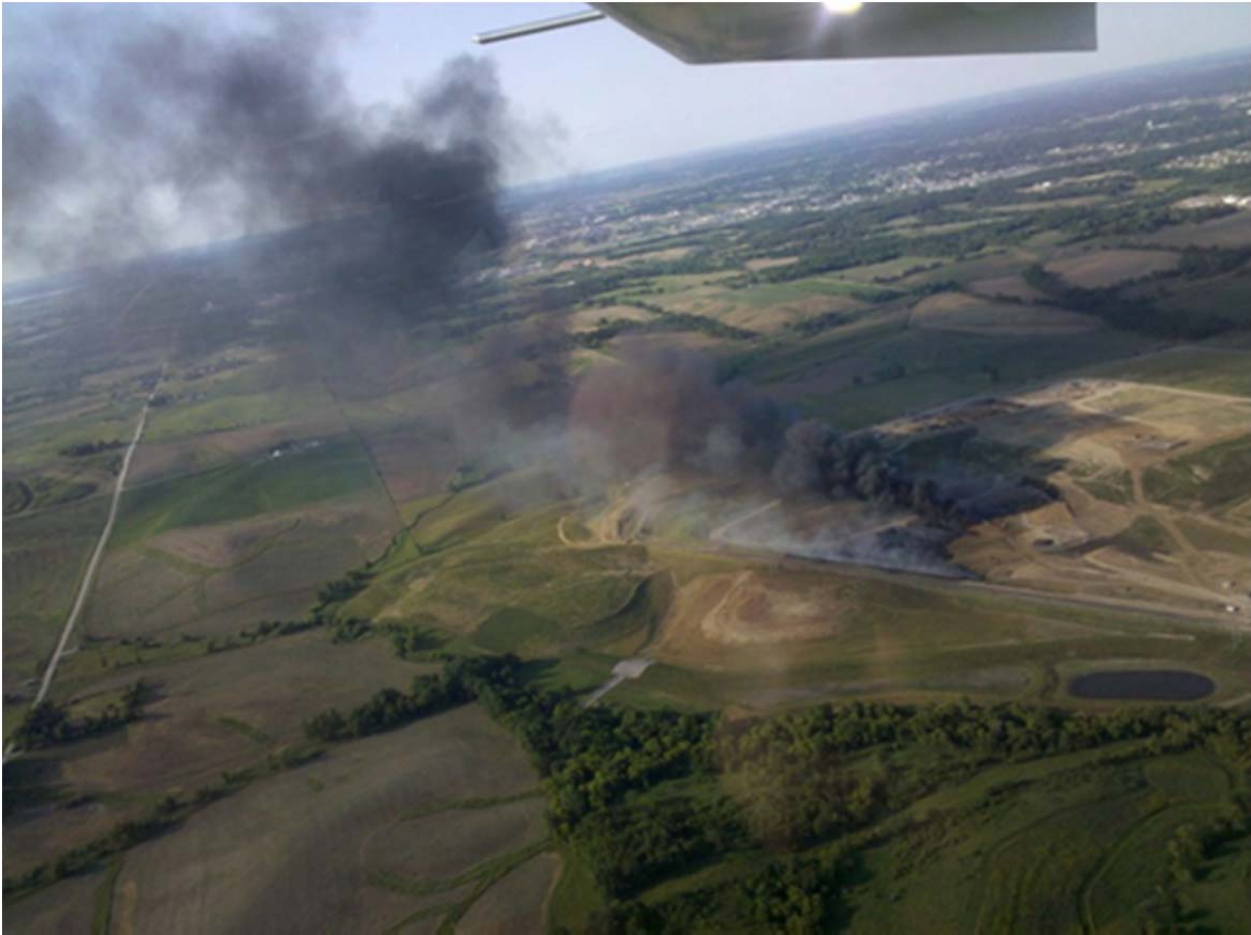

3  
4 Figure 1: Photograph of the Iowa City landfill fire, with smoke primarily from the burning shredded tire  
5 drainage layer  
6

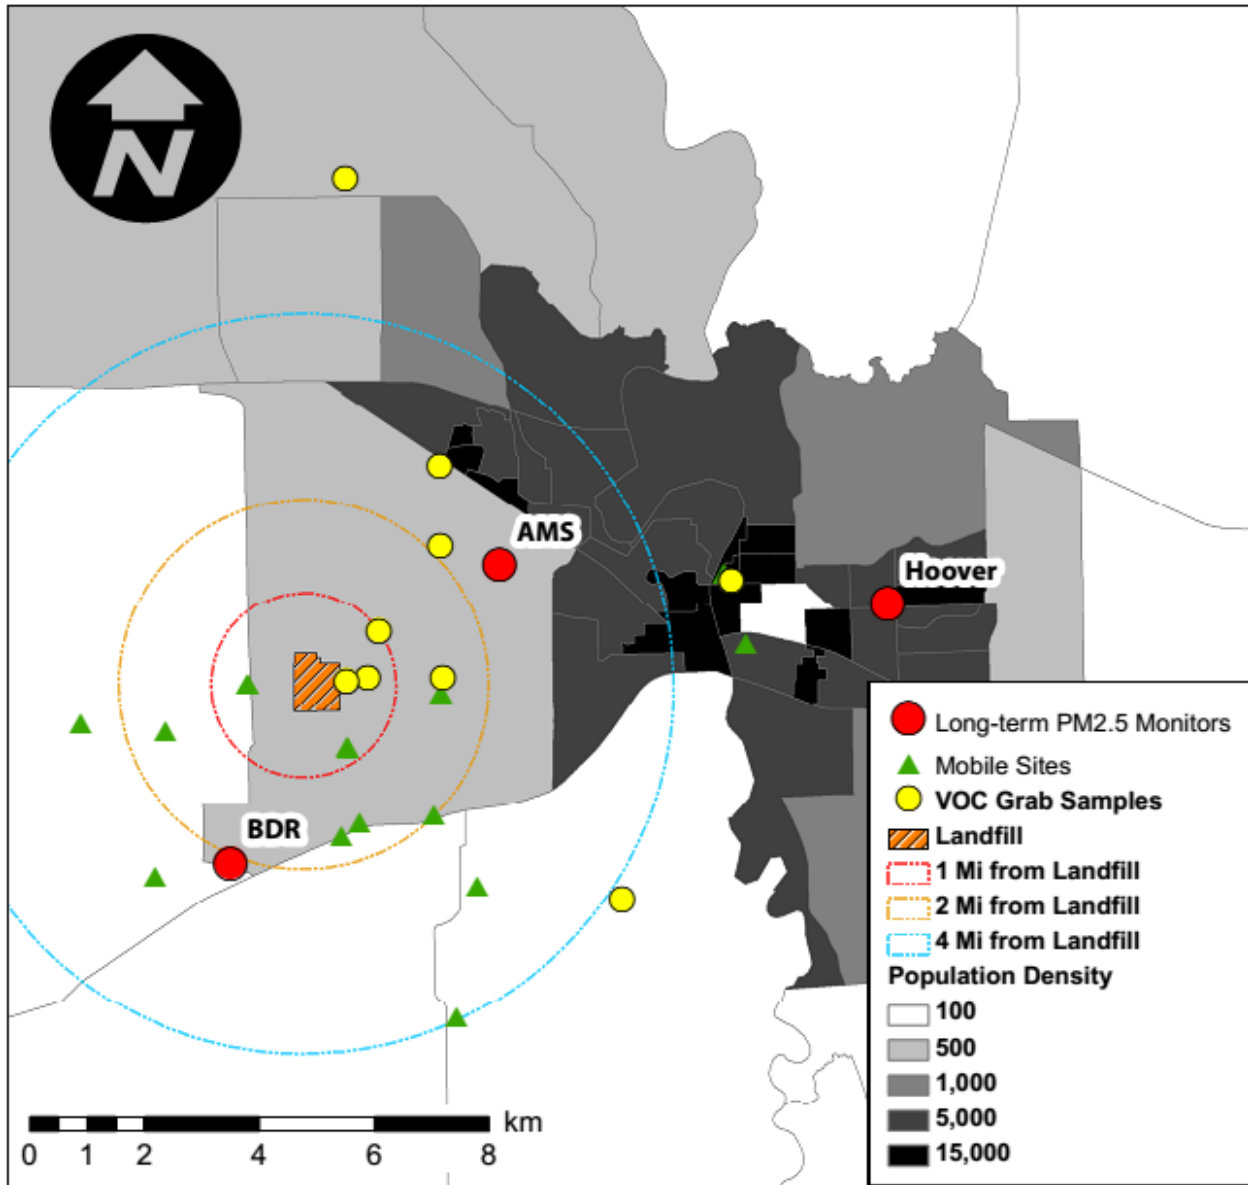

7

8 Figure 2: Map of the study area shaded by Census 2010 block group population density (persons/km<sup>2</sup>).  
 9 Symbols mark locations of air quality samples from mobile sampling (green triangles), VOC grab  
 10 samples (yellow circles), and long-term PM<sub>2.5</sub> monitors (red circles). Concentric circles mark radii of  
 11 1.6 km (1 mi, red), 3.2 km (2 mi, yellow), and 6.4 km (4 mi, blue) from the fire location.

12

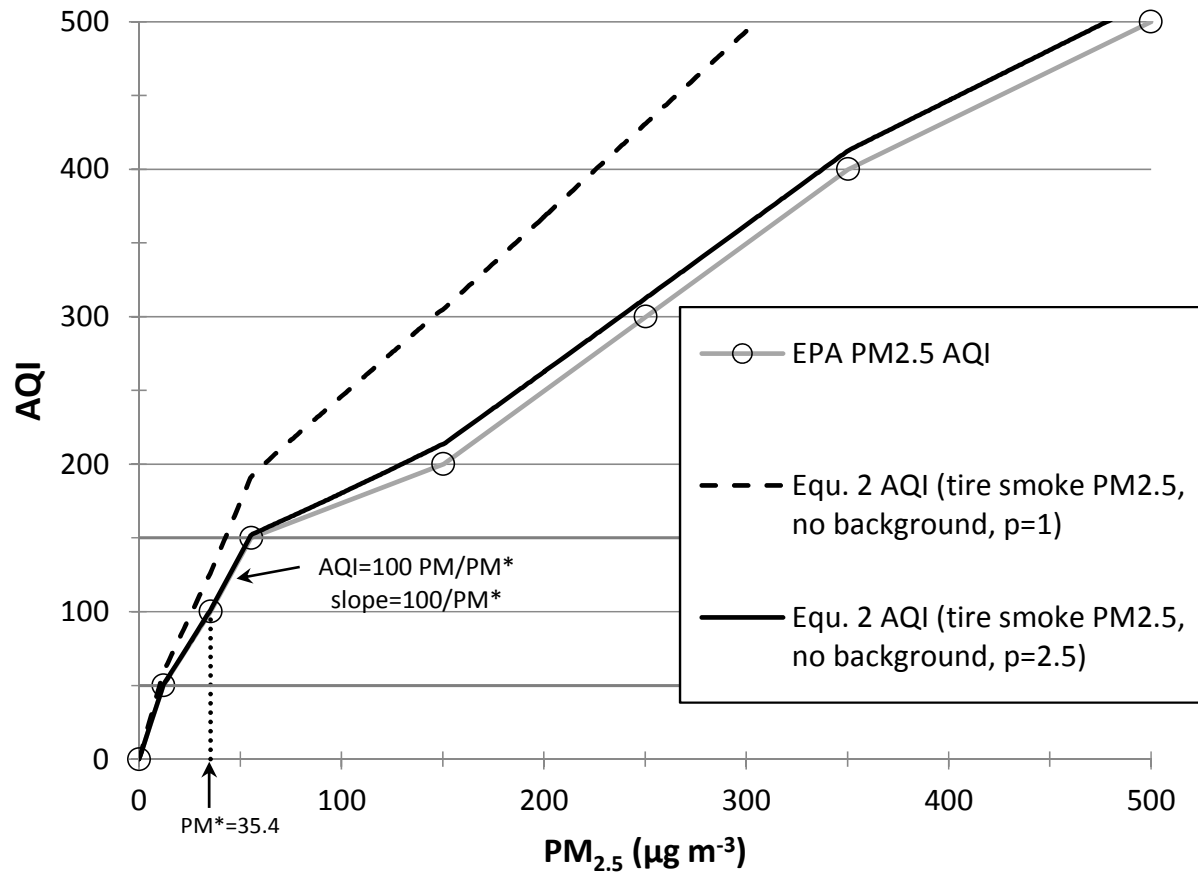

13

14 Figure 3: Relationship between PM<sub>2.5</sub> concentrations (x axis) and Air Quality Index (AQI) (y axis).  
 15 Two PM<sub>2.5</sub> vs. AQI relationships from equation 2 are compared to the current US EPA PM<sub>2.5</sub> Air  
 16 Quality Index.

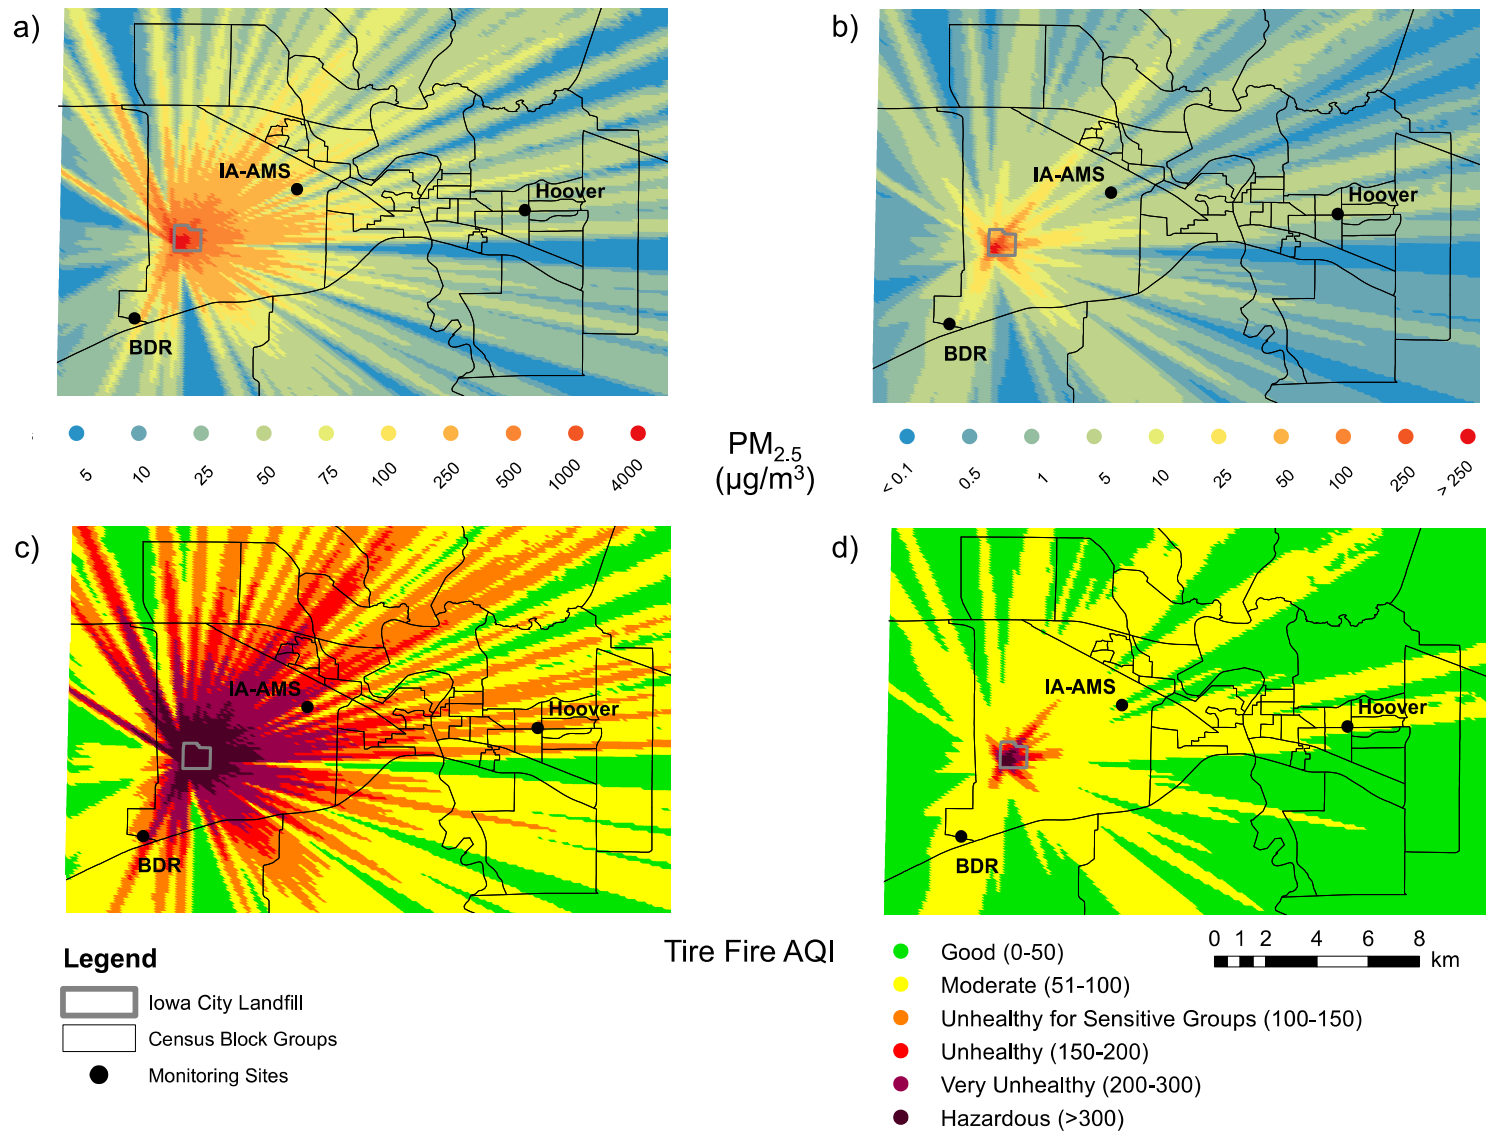

17

18 Figure 4: WRF-AERMOD dispersion model results for the period May 30 – June 12, 2012. (a) 1-h maximum concentration of tire  
 19 fire smoke ( $\mu\text{g}/\text{m}^3$   $\text{PM}_{2.5}$ ); (b) 24-h maximum concentration of tire fire smoke ( $\mu\text{g}/\text{m}^3$   $\text{PM}_{2.5}$ ); (c) 1-h maximum AQI (p=1); and (d)  
 20 24-h maximum AQI (p=1)

## **Supplementary Material for**

### **Uncontrolled Combustion of Shredded Tires in a Landfill**

#### **Part 2: Population Exposure, Public Health Response, and an Air Quality Index for Urban Fires**

Ashish Singh, Scott N. Spak, Elizabeth A. Stone, Jared Downard, Robert Bullard, Mark Pooley, Pamela A. Kostle, Matthew W. Mainprize, Michael D. Wichman, Thomas Peters, Douglas Beardsley, Charles O. Stanier

#### Contents of Supplemental Material:

1. Chronology of the tire fire and response
2. Supporting Information on Measurement Location and Measurement Methods
3. VOC Sampling Methodology and Results Detail
4. Support on the acute hazard ratio calculation
5. Support of the Multi-Pollutant AQI
6. Copy of the after action review completed by Johnson County Public Health

#### List of Tables

- S1. Chronology of Meteorology, Air Quality, and Air Quality Management Activities
- S2. Measurement Site Information
- S3. Characterization method overview, organized by sampling method (offline or real-time) and compound class
- S4. All TO-15 and selected TO-12 VOC measured during the tire fire
- S5. Acute hazard ratios derived from concentrations or emission factors from this work and from other ambient and laboratory combustion studies.
- S6. AQI Categories
- S7. Expanded version of Table 5 that includes additional tracers of the tire fire smoke (benzene, CO, and SO<sub>2</sub>, 1,3-butadiene, acrolein, CO<sub>2</sub>, and PM<sub>2.5</sub> B[a]P), using emission factor ratios.

### Section 1: Chronology of the tire fire and response

The fire was first reported during the evening of May 26, 2012 under conditions of clear skies, low PM<sub>2.5</sub> levels, and warm temperatures. Initial winds were southeasterly, carrying the plume to the northwest and away from populated areas. Populated areas to the north of the landfill were first impacted on May 27, and then areas to the southeast of the landfill on May 28. The plume dispersed most efficiently from May 26 – 28, as indicated by retrospective dispersion modeling. Over the next few days, more stable atmospheric conditions led to higher concentrations of PM<sub>2.5</sub>, measured up to 377 µg m<sup>-3</sup> at 8.4 km from the fire on May 30.

High concentrations impacted populated areas in the north, and northeast on June 2 and 3 during periods of low wind speeds, low boundary layer heights, and increased atmospheric stability. The fire-related pollutants PM<sub>2.5</sub>, SO<sub>2</sub>, particle number, EC, and PAH peaked in Iowa City from June 1-3 (Downard et al., co-submitted). Dispersion improved on June 3, as boundary layer heights increased to over 2 km.

A “stir, burn and cover” operation began on June 4 to manage the fire. In general, the plume was dispersed very effectively from June 4 until June 7, and then had moderate impacts north of the landfill during June 7-10. Retrospective dispersion model classifies June 7-8 as the period 2<sup>nd</sup> least conducive to dispersion, but the June 7 and 8 plumes were not captured by monitors. The fire was declared under control and the emergency operation stopped on June 12. Additional detail on weather, PM concentrations, sampler activities, and associated AERMOD predictions are found in the following table.

Table S1. Chronology of Meteorology, Air Quality, and Air Quality Management Activities

| Time period         | Meteorology                                                                                                                                                                                                                                                                                                                                                            | Air Quality                                                                                                                                                                                                                                                                                                                                                                                                                                                                                                                                                                                                                                                                                                                                                                                                                                         | Sampling, Forecasting, and Risk Management Activities                                                                                                                                                                                                                                                                                                                                                                                  |
|---------------------|------------------------------------------------------------------------------------------------------------------------------------------------------------------------------------------------------------------------------------------------------------------------------------------------------------------------------------------------------------------------|-----------------------------------------------------------------------------------------------------------------------------------------------------------------------------------------------------------------------------------------------------------------------------------------------------------------------------------------------------------------------------------------------------------------------------------------------------------------------------------------------------------------------------------------------------------------------------------------------------------------------------------------------------------------------------------------------------------------------------------------------------------------------------------------------------------------------------------------------------|----------------------------------------------------------------------------------------------------------------------------------------------------------------------------------------------------------------------------------------------------------------------------------------------------------------------------------------------------------------------------------------------------------------------------------------|
| May 26 (Sat)        | The fire was first reported during the evening (6:38 PM) of May 26, 2012. Conditions at the start of the fire were hot (high of 32°C), with clear skies and winds from the southeast. This carried the plume initially to sparsely populated areas to the northwest of the landfill.                                                                                   | Conditions at the start of the fire were clean (PM <sub>2.5</sub> of ~7 µg m <sup>-3</sup> ). Retrospective modeling shows the significant impact area (AQI>100, 1 h averaging time) extending a maximum distance of 1.3 km from the landfill.                                                                                                                                                                                                                                                                                                                                                                                                                                                                                                                                                                                                      | Iowa City contacts Johnson County Public Health (JCPH) for public health concerns about smoke. JCPH contacts Linn County Public Health (LCPH) and the State Hygienic Laboratory (SHL).                                                                                                                                                                                                                                                 |
| May 27-28 (Sun-Mon) | Hot and clear or partly cloudy conditions continued on the 27 <sup>th</sup> and 28 <sup>th</sup> , but with shifting winds, first southerly winds which carried the plume into the populated Coralville area on May 27, and then westerly and northwesterly winds bringing the plume to a residential neighborhood and close to a school (Weber Elementary) on May 28. | The peak value of benzene sampled during the fire is taken: 8.3 ppb at 300 m away from the fire on the 28th. Retrospective dispersion modeling indicates excellent plume dispersion during this period. Maximum (modeled) peak 8 h smoke concentration in a densely populated area is in Coralville IA at ~0.6 µg/m <sup>3</sup> PM <sub>2.5</sub> smoke. Significant impact area (AQI>100, 8 h averaging time) is modeled to extend a maximum distance of 0.7 km from the landfill.                                                                                                                                                                                                                                                                                                                                                                | Public health advisory appears in the local newspaper. <sup>1</sup> JCPH in contact with the IDNR for technical assistance. TO-15 canister samples begin at 5:30 PM on May 27. May 27 is a 1-in-3 sampling day for the IA-AMS PM <sub>2.5</sub> speciation sampler. This sampler is changed to every day operation.                                                                                                                    |
| May 29-31 (Tue-Thu) | Conditions shifted to cooler (high of 27°C) on May 29 with strong northwesterly winds. Cool and windy conditions, with some rain, prevailed on the May 30 and 31, with wind directions from the north and east (and therefore carrying the plume away from the populated areas).                                                                                       | No impact of the fire on Iowa City, Coralville, or North Liberty is expected due to the wind direction; out of the plume, the 24 h PM <sub>10</sub> filter (AMS site) reads 16 µg/m <sup>3</sup> , while the Hoover PM <sub>2.5</sub> BAM averages 3.7 µg/m <sup>3</sup> . Retrospective dispersion modeling has the plume to the south of the landfill for the entirety of this period, and the significant impact area (AQI>100, 8 h averaging time) modeled to extend up to 3.8 km to the southeast of the landfill. The Stanier group trailer achieves an interception of a well-diluted smoke plume at BDR on May 30 (ΔPM <sub>2.5</sub> of 0.7 µg/m <sup>3</sup> on a 6.3 µg/m <sup>3</sup> background, 30 min average). A hand held Dust Trak reads an instantaneous reading of 377 µg/m <sup>3</sup> at a distance of 8.2 km from the fire. | Handheld surveys of PM <sub>2.5</sub> and CO begin. JCPH sends an official request (on 5/31) for State and Federal assistance in air monitoring and assessment. The Stanier group trailer is first deployed on May 29 but is just to the east of the plume and records clean conditions. The first SHL PM <sub>10</sub> sample at IA-AMS is taken on May 30 and the first WRF-AERMOD and HPAC dispersion model forecasts are produced. |



| Time period        | Meteorology                                                                                                                                                                                                                                                                                                                                                                                                              | Air Quality                                                                                                                                                                                                                                                                                                                                                                                                                                                                                                                                                                                                                                                                                                                                                                                                                                                                                                                                                                                                                              | Sampling, Forecasting, and Risk Management Activities                                                                                                                                                                                                                                                                                                                                                                                                                                                                                                                                         |
|--------------------|--------------------------------------------------------------------------------------------------------------------------------------------------------------------------------------------------------------------------------------------------------------------------------------------------------------------------------------------------------------------------------------------------------------------------|------------------------------------------------------------------------------------------------------------------------------------------------------------------------------------------------------------------------------------------------------------------------------------------------------------------------------------------------------------------------------------------------------------------------------------------------------------------------------------------------------------------------------------------------------------------------------------------------------------------------------------------------------------------------------------------------------------------------------------------------------------------------------------------------------------------------------------------------------------------------------------------------------------------------------------------------------------------------------------------------------------------------------------------|-----------------------------------------------------------------------------------------------------------------------------------------------------------------------------------------------------------------------------------------------------------------------------------------------------------------------------------------------------------------------------------------------------------------------------------------------------------------------------------------------------------------------------------------------------------------------------------------------|
| June 1-3 (Fri-Sun) | On June 1-3, under cool conditions (highs of 20-27 C) light westerly winds threaten downtown Iowa City with landfill smoke and bring the plume to the IA-AMS and Hoover sites. This Friday – Sunday period is of special concern because an outdoor music festival is scheduled with large crowds in downtown Iowa City. Low boundary layer heights and neutral / stable conditions during some portions of this period. | Instantaneous PM <sub>2.5</sub> by Dust Trak is 510 µg/m <sup>3</sup> on June 1 at 2.4 km from the fire. June 2 is the day of the highest EC filter loading (AMS). PAH (24 h) is ~140 times background levels (AMS). During early morning of June 3, calm conditions and fog form, and high concentrations are recorded at the sites to the east of the landfill (1 h values of 48 and 71 µg/m <sup>3</sup> at AMS and Hoover, respectively). Reports of strong odor and respiratory irritation on the east side of Iowa City are noted. The retrospectively modeled area of significant impact (AQI > 100, 8 h averaging) extends farthest on the 2 <sup>nd</sup> , out to 5.8 km from the landfill into Coralville, and 4.4 km towards Iowa City, crossing Mormon Trek Blvd. into the west side neighborhood of University Heights (but not reaching downtown Iowa City under 8 h averaging). Maximum 8 h modeled concentrations of smoke in downtown Coralville and downtown Iowa City are 16 and 6 µg/m <sup>3</sup> , respectively. | Iowa City mayor signs a Local Disaster Declaration document (June 1) facilitating access to state and federal resources. Also on June 1, EPA region 7 personnel on site in Iowa City and participate in coordination meetings (SHL, JCPH, DNR, EPA) reviewing sampling activities and assessment. WRF-AERMOD forecasts shared with the JCPH predict poor dispersion, with hourly smoke concentrations in excess of 50 µg/m <sup>3</sup> in populated areas up to 9 km from the landfill. A plume transect experiment samples plume size distribution and number concentration at 3 distances. |
| June 4-7 (Mon-Thu) | From June 4-7, light easterly winds and favorable conditions for vertical plume dispersion prevail, carrying the plume up and away from populated areas. Heavy equipment operation at the landfill site begins on June 3 as part of the “stir burn and cover” operation and this creates a darker and larger smoke plume.                                                                                                | The highest instantaneous concentration of the fire period is recorded on a DustTrak instrument, 2000 µg/m <sup>3</sup> at a distance of 1.0 km under very smoky conditions during the morning of June 4. Upwind of the plume, the average PM <sub>2.5</sub> in Iowa City (Hoover) during this time is 9.4 µg/m <sup>3</sup> and the highest 1 h concentration is 21 µg/m <sup>3</sup> . The modeled area of significant impact (AQI > 100, 8 h averaging) extends to 1.5 km to the northwest of the landfill.                                                                                                                                                                                                                                                                                                                                                                                                                                                                                                                           | WRF-AERMOD forecasts predicting excellent vertical dispersion of the plume are shared with JCPH. Handheld and TO-15 canister sampling is suspended.                                                                                                                                                                                                                                                                                                                                                                                                                                           |

| Time period         | Meteorology                                                                                                                                                                                                                                                                                                                        | Air Quality                                                                                                                                                                                                                                                                                                                                                                                                                                                                       | Sampling, Forecasting, and Risk Management Activities |
|---------------------|------------------------------------------------------------------------------------------------------------------------------------------------------------------------------------------------------------------------------------------------------------------------------------------------------------------------------------|-----------------------------------------------------------------------------------------------------------------------------------------------------------------------------------------------------------------------------------------------------------------------------------------------------------------------------------------------------------------------------------------------------------------------------------------------------------------------------------|-------------------------------------------------------|
| June 7-12 (Thu-Tue) | The evening of June 7 to June 10 brings southerly winds carrying the plume north towards Coralville and North Liberty. Conditions transition to westerly and northwesterly winds and cooler temperatures on June 11 and 12. The fire is declared fully under control and the stir, burn and cover operation is stopped on June 12. | Elevated EC concentration (AMS) on June 7, and the highest IA-AMS PM <sub>10</sub> sample (29 µg/m <sup>3</sup> ) is taken on June 8. No visible smoke from the landfill as of June 12. The modeled area of significant impact (AQI > 100, 8 h averaging) extends to 3.9 km to the north of the landfill, towards North Liberty. A peak 8 h average concentration of landfill smoke of 2.7 µg/m <sup>3</sup> is modeled for the North Liberty library, 11.4 km from the landfill. |                                                       |

<sup>1</sup> (Source: Press Citizen) The Johnson County Health Department warns residents in the path of the smoke to avoid exposure to the smoke as much as possible. Persons who have respiratory, heart or other conditions which may be aggravated by smoke and the young and elderly should shelter in place with outside sources of air shut off. Most home air conditioning units recirculate air from the interior and should be sufficient. Businesses and other structures which draw in outside air should close outside air sources if the smoke plume is present. Avoid outdoor activities such as exercising if the smoke plume is present. Nursing homes, day cares and other businesses which care for the elderly, very young and persons with respiratory diseases should take special care to monitor the health of clients and to minimize exposure to the smoke plume.

By June 4, the public health advisory was unchanged in a press release by the City of Iowa City. However, the following two additional sentences were added: Concentration (increase and decrease) of particulate matter and other irritants in the smoke are greatly affected by weather conditions. Individuals are the best judges of their own health and should take appropriate protective measures based on their health status.

Section 2. Supporting Information on Measurement Location and Measurement Methods

Table S2. Measurement site information

| Site                                                   | Latitude, Longitude | Distance to landfill site (km) | Observations                                                                                                                                                                  | Dates                           |
|--------------------------------------------------------|---------------------|--------------------------------|-------------------------------------------------------------------------------------------------------------------------------------------------------------------------------|---------------------------------|
| <b>University of Iowa Air Monitoring Site (IA-AMS)</b> | 41.6647, -91.5845   | 4.2                            | Particle Size Distribution, PN, CO <sub>2</sub> , SO <sub>2</sub> , CO (6/1-6/4); PM <sub>2.5</sub> filters for speciation (05/27-06/10); PM <sub>10</sub> mass (05/31-06/10) | see dates at left               |
| <b>Hoover Elementary Site<sup>a</sup></b>              | 41.6572, -91.5035   | 10.5                           | Continuous 1 h PM <sub>2.5</sub> , 24 h PM <sub>2.5</sub> (gravimetric)                                                                                                       | ongoing routine monitoring site |
| <b>Black Diamond Road (BDR)</b>                        | 41.6188, -91.6422   | 3.2                            | Particle Size Distribution, PN, CO <sub>2</sub> , SO <sub>2</sub> , CO                                                                                                        | 05/30/2012-06/01/2012           |
| <b>Plume Transect</b>                                  |                     |                                |                                                                                                                                                                               |                                 |
| 1.Site A                                               | 41.6366,-91.6173    | 1.3                            |                                                                                                                                                                               | 06/01/2012                      |
| 2.Site B                                               | 41.6248, -91.6150   | 3.2                            | Particle size distribution, PN, BC                                                                                                                                            | 06/01/2012                      |
| 3.Site C                                               | 41.6143, -91.5907   | 4.8                            |                                                                                                                                                                               | 06/01/2012                      |
| <b>Landfill</b>                                        | 41.6469, -91.6194   | 0.3                            | VOC (TO-15, TO-12 Air Toxic)                                                                                                                                                  | 06/01/2012                      |
| <b>Community Samples</b>                               |                     |                                |                                                                                                                                                                               |                                 |
| Weber School                                           | 41.6472, -91.5969   | 2.4                            | VOC (TO-15 & 12)                                                                                                                                                              | 5/28/2012                       |
| University of Iowa, Pentacrest                         | 41.6614, -91.5361   | 7.6                            | “                                                                                                                                                                             | 06/02/2012                      |
| Camp Cardinal Rd.                                      | 41.6678, -91.5969   | 3.4                            | “                                                                                                                                                                             | 05/27/2012                      |
| Dane Road, SW                                          | 41.6117, -91.5605   | 6.7                            | “                                                                                                                                                                             | 06/01/2012                      |
| Slothower St.                                          | 41.6548, -91.6100   | 1.6                            | “                                                                                                                                                                             | 06/01/2012                      |
| First Ave. and 22 <sup>nd</sup> Ave. Coralville        | 41.6803, -91.5967   | 4.5                            | “                                                                                                                                                                             | 05/27/2012                      |
| Forever Green Rd. and Route 965, N. Liberty            | 41.7257, -91.6151   | 8.3                            | “                                                                                                                                                                             | 05/27/2012                      |

<sup>a</sup> EPA SLAMS Network in Iowa City for residential population exposure at Hoover Elementary School

Table S3: Characterization method overview, organized by sampling method (offline or real-time) and compound class

| Analyte                                                                                     | Method and Instrumentation                                             | Research Group <sup>4</sup> | Site(s)                                                                                 | Smoke Characterization <sup>2</sup> | Numerical Emission Factor | Exposure Assessment <sup>3</sup> | Handheld | Hazard Ratio |
|---------------------------------------------------------------------------------------------|------------------------------------------------------------------------|-----------------------------|-----------------------------------------------------------------------------------------|-------------------------------------|---------------------------|----------------------------------|----------|--------------|
| TO-15, TO-12 VOCs                                                                           | Collection in 6L canisters and GC/MS                                   | SHL                         | Various                                                                                 | C                                   |                           | E, R                             |          | ●            |
| PM <sub>2.5</sub> , PM <sub>10</sub>                                                        | Beta Attenuation and Gravimetric filter (low volume)                   | SHL                         | Hoover (PM <sub>2.5</sub> & PM <sub>10</sub> ); IA-AMS (PM <sub>10</sub> ) <sup>5</sup> |                                     |                           | E, R                             |          |              |
| PM <sub>2.5</sub> speciation (OC, EC, inorganic ions, metals and organic molecular markers) | Various, see text                                                      | Stone                       | IA-AMS                                                                                  | C                                   | ●                         | R                                |          | ●            |
| SO <sub>2</sub>                                                                             | UV fluorescence (Teledyne 100E)                                        | Stanier                     | BDR, IA-AMS                                                                             | C                                   | ●                         | R                                |          | ●            |
| CO <sub>2</sub>                                                                             | Infrared absorption (Vaisala 343 GMP)                                  | Stanier                     | BDR, IA-AMS                                                                             |                                     | ●                         |                                  |          |              |
| CO                                                                                          | NDIR absorption (Thermo 48i-TLE)                                       | Stanier                     | BDR, IA-AMS                                                                             | C                                   | ●                         |                                  |          |              |
| CO                                                                                          | TSI 7575 Q-Track with electro-chemical CO sensor (IAQ-Probe Model 982) | JCPH                        | Various                                                                                 |                                     |                           | E                                | ●        |              |
| PM <sub>2.5</sub>                                                                           | Beta attenuation (BAM-1020)                                            | SHL                         | Hoover                                                                                  |                                     |                           | E, R                             |          |              |
| PM <sub>2.5</sub>                                                                           | Light scattering photometer (TSI Dust Track-8532) <sup>1</sup>         | JCPH                        | various                                                                                 |                                     |                           | E                                | ●        |              |
| Particle size distribution                                                                  | Scanning Mobility Particle Sizer and Aerosol Particle Sizer            | Stanier                     | BDR, IA-AMS, plume transect                                                             | P                                   | ●                         | R                                |          | ●            |
| Particle number (PN)                                                                        | Condensation particle counter (TSI CPC 3786)                           | Stanier                     | BDR, IA-AMS, plume transect                                                             | P                                   | ●                         | R                                |          |              |

<sup>1</sup>Sensitive in to particles from 0.1-10 µm; <sup>2</sup>C indicates chemical characterization; P indicates physical characterization; <sup>3</sup>E indicates used mainly for exposure assessment during the incident; R indicates mainly used for retrospective assessment; <sup>4</sup>State Hygienic Lab (SHL), Johnson County Public Health (JCPH); <sup>5</sup>PM10 at IA-AMS is gravimetric mid volume sampler installed just for the tire fire period.

### Section 3. VOC Sampling Methodology and Results Detail

Ambient VOC concentrations were determined by EPA methods TO-12 and TO-15 (EPA, 1999). Ten grab samples, representing background and plume-impacted air, were collected in pre-cleaned 6-L Summa canisters (Entech Silonite™). Analysis was by gas chromatography (GC) mass spectrometry (Agilent Technologies 7890A, 5975C; 60 m DB-1 column) with canister autosampler (Entech 7016), dynamic dilution (Entech 4600A), and pre-concentration (Entech 7100A). Each analysis used 500 cm<sup>3</sup> of sample and 100 cm<sup>3</sup> of internal standard, and thermal desorption into the GC by splitless injection. Initial calibration range for all 54 analytes was nominally 0.5 to 10 ppbv.









|    | Species                    | Method detection limit | Method of detection       | Coralville –End st/22 <sup>nd</sup> Avenue | Iowa City- Camp Cardinal/Melrose | Iowa City near landfill | North Liberty, forevergreen road/965 | Weber School, Iowa City | Iowa City Penta crest ( not in plume) | Dane RD SW, Iowa city (in plume) | Iowa City, near fire | Slothower road, Iowa City (in plume) | Iowa City Penta crest (in plume) |
|----|----------------------------|------------------------|---------------------------|--------------------------------------------|----------------------------------|-------------------------|--------------------------------------|-------------------------|---------------------------------------|----------------------------------|----------------------|--------------------------------------|----------------------------------|
|    |                            | (ppbv)                 |                           | 05/27/2012/17:58                           | 5/27/2012 18:11                  | 5/27/2012 17:34         | 5/27/2012 17:40                      | 5/28/2012 16:53         | 6/1/2012 15:20                        | 6/1/2012 18:52                   | 6/1/2012 15:32       | 6/1/2012 17:50                       | 6/2/2012 7:00                    |
| 51 | Octane                     | 0.14                   |                           | <0.14                                      | <0.14                            | <0.14                   | <0.14                                | <0.14                   | <0.14                                 | <0.14                            | <0.14                | <0.14                                | <0.14                            |
|    | <b>Terpenoid compounds</b> |                        | To-12 Speciated           |                                            |                                  |                         |                                      |                         |                                       |                                  |                      |                                      |                                  |
| 52 | α-Pinene                   | 0.06                   | non-Methane Organics      | 0.31                                       | 0.13                             | 0.08                    | <0.06                                | <0.06                   | 0.1                                   | 0.76                             | 0.38                 | <0.06                                | <0.06                            |
| 53 | Isoprene                   | 0.08                   |                           | 4.13                                       | 1.77                             | 2.49                    | 0.47                                 | 0.54                    | 0.14                                  | 0.39                             | 16.14                | 0.31                                 | 0.24                             |
|    | <b>Carbonyl compounds</b>  |                        |                           |                                            |                                  |                         |                                      |                         |                                       |                                  |                      |                                      |                                  |
| 54 | Acrolein                   | 0.08                   | GCMS volatiles, EPA TO-15 | 0.17                                       | 0.17                             | 1.5                     | 0.24                                 | 0.14                    | <0.08                                 | <0.08                            | 1.7                  | <0.08                                | <0.08                            |
| 55 | Methyl ethyl ketone        | 0.18                   |                           | <0.18                                      | <0.18                            | <0.18                   | <0.18                                | <0.18                   | <0.18                                 | <0.18                            | <0.18                | <0.18                                | <0.18                            |
| 56 | Methyl Isobutyl Ketone     | 0.16                   |                           | <0.16                                      | <0.16                            | <0.16                   | <0.16                                | <0.16                   | <0.16                                 | <0.16                            | 3.47                 | <0.16                                | <0.16                            |
| 57 | Ethane                     | 0.03                   | To-12 Speciated           | 3.85                                       | 3.81                             | 41.7                    | 3.73                                 | 4.7                     | 2.5                                   | 4.07                             | >20                  | 2.5                                  | 3.07                             |
| 58 | propane                    | 0.1                    |                           | 1.99                                       | 2.09                             | 20.4                    | 1.85                                 | 3.04                    | 0.59                                  | 1.5                              | >20                  | 0.59                                 | 1.68                             |
| 59 | Butane                     | 0.1                    |                           | 1                                          | 1.06                             | 6.07                    | 0.74                                 | 1.4                     | 0.29                                  | 1.08                             | >20                  | 0.31                                 | 0.54                             |
| 60 | Isopentane                 | 0.08                   |                           | 0.78                                       | 0.64                             | 3.67                    | 0.5                                  | 0.56                    | 0.3                                   | 1.05                             | >20                  | 0.37                                 | 0.75                             |
| 61 | Hexane                     | 0.18                   | non-Methane Organics      | 0.18                                       | 0.16                             | 1.1                     | 0.17                                 | 0.19                    | 0.08                                  | 0.17                             | 15.58                | 0.13                                 | 0.18                             |
| 62 | Nonane                     | 0.05                   |                           | 0.11                                       | 0.07                             | 0.37                    | <.05                                 | 0.17                    | 0.21                                  | 0.16                             | 5.39                 | <.05                                 | 0.06                             |
| 63 | Isopropyl benzene          | 0.07                   |                           | <0.07                                      | <0.07                            | 0.6                     | <0.07                                | <0.07                   | <0.07                                 | 0.09                             | 12.21                | <0.07                                | <0.07                            |
| 64 | m-ethyltoluene             | 0.08                   |                           | <0.08                                      | <0.08                            | 1.53                    | 0.11                                 | <0.08                   | 0.12                                  | 0.22                             | >20                  | 0.15                                 | 0.11                             |
| 65 | p-ethyltoluene             | 0.1                    |                           | <0.1                                       | <0.1                             | 0.76                    | 0.8                                  | <0.1                    | 0.05                                  | 0.15                             | >20                  | 0.08                                 | 0.06                             |
| 66 | 1-decene                   | 0.08                   |                           | 0.11                                       | 0.09                             | 2.58                    | 0.09                                 | 0.09                    | 0.15                                  | 0.17                             | >20                  | 0.19                                 | 0.21                             |
| 67 | Decane                     | 0.08                   |                           | 0.04                                       | 0.07                             | 1.13                    | <0.08                                | <0.08                   | <0.08                                 | 0.11                             | 18.3                 | 0.09                                 | <0.08                            |

|    | Species             | Method<br>detection<br>limit | Method<br>of<br>detection | Coralville –End<br>st/22 <sup>nd</sup> Avenue | Iowa City- Camp<br>Cardinal/Melrose | Iowa City near<br>landfill | North Liberty,<br>forevergreen<br>road/965 | Weber School,<br>Iowa City | Iowa City<br>Penta crest (<br>not in plume) | Dane RD SW,<br>Iowa city (in<br>plume) | Iowa City, near<br>fire | Slothower<br>road, Iowa<br>City (in<br>plume) | Iowa City<br>Penta<br>crest (in<br>plume) |
|----|---------------------|------------------------------|---------------------------|-----------------------------------------------|-------------------------------------|----------------------------|--------------------------------------------|----------------------------|---------------------------------------------|----------------------------------------|-------------------------|-----------------------------------------------|-------------------------------------------|
|    |                     | (ppbv)                       |                           | 05/27/2012/17:58                              | 5/27/2012 18:11                     | 5/27/2012 17:34            | 5/27/2012 17:40                            | 5/28/2012 16:53            | 6/1/2012 15:20                              | 6/1/2012 18:52                         | 6/1/2012 15:32          | 6/1/2012<br>17:50                             | 6/2/2012<br>7:00                          |
| 68 | Dodecane            | 0.08                         |                           | <0.08                                         | <0.08                               | 0.13                       | 0.08                                       | 0.06                       | <.08                                        | <0.08                                  | 3.4                     | 0.03                                          | <.08                                      |
| 69 | m-dimethyle benzene | 0.05                         |                           | <0.05                                         | <0.05                               | 0.08                       | <0.05                                      | <0.05                      | <0.05                                       | 0.19                                   | 1.75                    | <0.05                                         | <0.05                                     |
| 70 | p-dimethyl benzene  | 0.04                         |                           | 0.09                                          | 0.08                                | 0.49                       | 0.07                                       | 0.2                        | <0.04                                       | <0.04                                  | 11.7                    | 0.24                                          | 0.14                                      |

Section 4. Support on the acute hazard ratio calculation

Table S5. Acute hazard ratios derived from concentrations or emission factors from this work and from other ambient and laboratory combustion studies.

| CAS       | Species                | TLV-TWA <sup>a</sup><br>(mg/m <sup>3</sup> ) | STEL or Ceiling <sup>b</sup><br>(mg/m <sup>3</sup> ) | AEGL-1 (1 hr, mg/m <sup>3</sup> ) | EPA Lab burn <sup>d</sup> |        |      | Westley,CA tire fire <sup>e</sup> |          |      | This study, VOC canister   |          |      | This study emission factor |       |      | Pooled oil burn <sup>f</sup> |       |      |
|-----------|------------------------|----------------------------------------------|------------------------------------------------------|-----------------------------------|---------------------------|--------|------|-----------------------------------|----------|------|----------------------------|----------|------|----------------------------|-------|------|------------------------------|-------|------|
|           |                        |                                              |                                                      |                                   | EF (mg/kg)                | HR     | Rank | Conc. (µg/m <sup>3</sup> )        | HR x1000 | Rank | Conc. (µg/m <sup>3</sup> ) | HR x1000 | Rank | EF (mg/kg)                 | HR    | Rank | EF (mg/kg)                   | HR    | Rank |
| none      | PM <sub>25</sub>       | 3                                            | -                                                    | -                                 | -                         | -      |      | -                                 | -        |      | -                          | -        |      | 5350                       | 357** | 2    | -                            | -     |      |
| 7446-09-5 | SO <sub>2</sub>        | 0.65                                         | 0.66 <sup>i</sup>                                    | 0.52                              | -                         | -      |      | -                                 | -        |      | -                          | -        |      | 7090                       | 13528 | 1    | -                            | -     |      |
| 630-08-0  | CO                     | 29                                           | 458                                                  | -                                 | 1.2E+05                   | 262 *  | 2    | 229                               | 0.50 *   | 2    | -                          | -        |      | -                          | -     |      | 30000                        | 65 *  | 3    |
| none      | PM <sub>10</sub>       | 10                                           | -                                                    | -                                 | 1.5E+05                   | 2980** | 1    | 557                               | 11.1**   | 1    | -                          | -        |      | -                          | -     |      | -                            | -     |      |
| none      | BC                     | 3.5                                          | -                                                    | -                                 | -                         | -      |      | 8                                 | 0.46**   | 2    | -                          | -        |      | 2410                       | 138** | 3    | -                            | -     |      |
| 71-41-2   | Benzene                | 1.6                                          | 16 <sup>ii</sup>                                     | 166                               | 2205                      | 13.3   | 7    | 9.2                               | 0.055    | 3    | 26.4                       | 0.16     | 2    | -                          | -     |      | 251                          | 1.5   | 5    |
| 92-52-4   | Biphenyl               | 1.26                                         | -                                                    | -                                 | 330                       | 52**   | 3    | -                                 | -        |      | -                          | -        |      | -                          | -     |      | -                            | -     |      |
| 100-40-3  | Vinylcyclohexene       | 0.44                                         | -                                                    | -                                 | 108                       | 49**   | 4    | -                                 | -        |      | -                          | -        |      | -                          | -     |      | -                            | -     |      |
| 100-52-7  | Benzaldehyde           | 8.8                                          | 17.4 <sup>i</sup>                                    | -                                 | 664                       | 38 *   | 5    | -                                 | -        |      | -                          | -        |      | -                          | -     |      | 44                           | 2.5 * | 4    |
| 91-20-3   | Naphthalene            | 52                                           | 79 <sup>j</sup>                                      | -                                 | 1195                      | 15.2 * | 6    | -                                 | -        |      | -                          | -        |      | -                          | -     |      | 44                           | 0.6   | 6    |
| 108-95-2  | Phenol                 | 19.2                                         | 60 <sup>iii</sup>                                    | 58                                | 714                       | 12.4   | 8    | -                                 | -        |      | -                          | -        |      | -                          | -     |      | -                            | -     |      |
| 106-99-0  | 1,3-Butadiene          | 4.4                                          | 11.1 <sup>ii</sup>                                   | 1482                              | 160                       | 0.108  | 14   | 1.1                               | 7E-4     | 4    | 1.5                        | 0.001    | 6    | -                          | -     |      | -                            | -     |      |
| 108-88-3  | Toluene                | 75                                           | 565 <sup>iii</sup>                                   | 754                               | 2519                      | 3.3    | 12   | -                                 | -        |      | 32                         | 0.04     | 3    | -                          | -     |      | 42                           | 0.06  | 7    |
| 100-41-4  | Ethyl benzene          | 87                                           | 543 <sup>iii</sup>                                   | 143                               | 632                       | 4.4    | 11   | -                                 | -        |      | 2.9                        | 0.02     | 4    | -                          | -     |      | 10                           | 0.07  | 7    |
| 95-13-6   | Indene                 | 23.7                                         | 71 <sup>iv</sup>                                     | -                                 | 339                       | 4.8 *  | 10   | -                                 | -        |      | -                          | -        |      | -                          | -     |      | -                            | -     |      |
| 100-42-5  | Styrene                | 85                                           | 170 <sup>i</sup>                                     | 85                                | 646                       | 7.6    | 9    | -                                 | -        |      | 2.51                       | 0.03     | 4    | -                          | -     |      | -                            | -     |      |
| 95-63-6   | 1,2,4-Trimethylbenzene | 123                                          | -                                                    | 688                               | 826                       | 1.2    | 13   | -                                 | -        |      | 1.3                        | 0.002    | 5    | -                          | -     |      | 32                           | 0.05  | 7    |

| CAS      | Species             | TLV-TWA <sup>a</sup><br>(mg/m <sup>3</sup> ) | STEL or Ceiling <sup>b</sup><br>(mg/m <sup>3</sup> ) | AEG-1 (1 hr, mg/m <sup>3</sup> ) | EPA Lab burn <sup>d</sup> |        |      | Westley,CA tire fire <sup>e</sup> |          |      | This study, VOC canister   |          |      | This study emission factor |    |      | Pooled oil burn <sup>f</sup> |         |      |
|----------|---------------------|----------------------------------------------|------------------------------------------------------|----------------------------------|---------------------------|--------|------|-----------------------------------|----------|------|----------------------------|----------|------|----------------------------|----|------|------------------------------|---------|------|
|          |                     |                                              |                                                      |                                  | EF (mg/kg)                | HR     | Rank | Conc. (µg/m <sup>3</sup> )        | HR x1000 | Rank | Conc. (µg/m <sup>3</sup> ) | HR x1000 | Rank | EF (mg/kg)                 | HR | Rank | EF (mg/kg)                   | HR      | Rank |
| 138-86-3 | Limonene            | 557                                          | -                                                    | -                                | 3239                      | 1.16** | 13   | -                                 | -        |      | -                          | -        |      | -                          | -  |      | -                            | -       |      |
| none     | Xylene, mixed       | 434                                          | 651 <sup>i</sup>                                     | 564                              | 2013                      | 3.6    | 12   | -                                 | -        |      | 9.9                        | 0.017    | 5    | -                          | -  |      | 25                           | 0.04    | 7    |
| 98-82-8  | Cumene              | 246                                          | -                                                    | 246                              | 398                       | 1.62   | 13   | -                                 | -        |      | -                          | -        |      | -                          | -  |      | -                            | -       |      |
| 107-02-8 | Acrolein            | 0.23                                         | 0.23 <sup>i,c</sup>                                  | 0.07                             | -                         | -      |      | -                                 | -        |      | 3.4                        | 49       | 1    | -                          | -  |      | 11                           | 160     | 1    |
| 50-00-0  | Formaldehyde        | 0.37                                         | 2.46 <sup>ii</sup>                                   | 1.11                             | -                         | -      |      | -                                 | -        |      | -                          | -        |      | -                          | -  |      | 139                          | 126     | 2    |
| 590-86-3 | Isovaleraldehyde    | 4.7                                          | -                                                    | -                                | -                         | -      |      | -                                 | -        |      | -                          | -        |      | -                          | -  |      | 5                            | 0.3**   | 6    |
| 75-07-0  | Acetaldehyde        | 45                                           | 45 <sup>i,c</sup>                                    | 81                               | -                         | -      |      | -                                 | -        |      | -                          | -        |      | -                          | -  |      | 32                           | 0.4     | 6    |
| 67-64-1  | Acetone             | 1188                                         | 1782 <sup>i</sup>                                    | 475                              | -                         | -      |      | -                                 | -        |      | -                          | -        |      | -                          | -  |      | 20                           | 0.04    | 7    |
| 111-84-2 | Nonane              | 1050                                         | -                                                    | -                                | -                         | -      |      | -                                 | -        |      | -                          | -        |      | -                          | -  |      | 13                           | 0.003** | 9    |
| 338-23-4 | Methyl ethyl ketone | 590                                          | 885 <sup>i</sup>                                     | 590                              | -                         | -      |      | -                                 | -        |      | -                          | -        |      | -                          | -  |      | 7                            | 0.01    | 8    |
| 50-32-8  | B[a]P               | -                                            | -                                                    | -                                | 114                       | -      |      | 0.15                              | -        |      | -                          | -        |      | 3.6                        | -  |      | 7                            | -       |      |

Abbreviations: Emission factor (EF); Concentration (Conc.), and Hazard ratio (HR)

\*STEL used in place of AEG-1; \*\*5 x TLV used in place of AEG-1; **(a)** ACGIH: Documentation of the Threshold Limit Values (TLVs) and Biological Exposure Indices (BEIs). 2014. A summary of recent values can be found at <https://www.osha.gov/dsg/annotated-pels/tablez-1.html>; **(b)** STEL or Ceiling values (c) are based on (i) ACGIH, (ii) OSHA (iii) NIOSH (iv) Australian STEL; **(d)** Shredded tire combustion in EPA (1997). Values also reported in Lemieux et al. (2004); **(e)** Westley tire fire - 1 hr max concentration from Westley Livingston site at 4-5 miles downwind of the tire fire. **(f)** Crude oil emission factor are taken from Lemieux et al 2004 , table 8, page 20 [values are based from the original research work of Booher and Janke 1999]

## Section 5. Support of the Multi-Pollutant AQI

An example calculation of the 1-h AQI resulting from 300  $\mu\text{g}/\text{m}^3$  of tire fire smoke.

The result can be seen from Table 5, and is 330. But additional details regarding the calculation are shown here.

- 300  $\mu\text{g}/\text{m}^3$  of  $\text{PM}_{2.5}$  at 1-h averaging time alone, with no copollutants, carries an AQI of 188
- $\text{SO}_2$  is co-emitted, and will be at a concentration of 398  $\mu\text{g}/\text{m}^3$ , or 152 ppb. This has a 1-h AQI of 135 as calculated at [http://www.airnow.gov/index.cfm/index.cfm?action=resources.conc\\_aqi\\_calc](http://www.airnow.gov/index.cfm/index.cfm?action=resources.conc_aqi_calc)
- The the  $\text{SO}_2$  AQI contribution as 134.9.
- With  $p=1$ , these combine to 323
- These two compounds represent 97.9% of the total AQI.

The remaining 2.1% contribution are from a number of VOC compounds (listed in Table 6).

One of them is benzene, and its contribution is detailed here.

Benzene is coemitted with a mass ratio (relative to  $\text{PM}_{2.5}$ ) of 0.41, so it is present in a concentration of 124  $\mu\text{g}/\text{m}^3$ , or 38.7 ppb. This is associated with a benzene AQI contribution of 0.21. This is calculated as follows.

1. The first AQI breakpoint of  $\text{SO}_2$  at the 1-h averaging time is AQI 50, concentration of 91.7  $\mu\text{g}/\text{m}^3$ , or 35 ppb.
2. The AEGL-1 (1-h) for  $\text{SO}_2$  is 200 ppb.
3. The AEGL-1 (1-h) for benzene is 52 ppm, or 52,000 ppb.
4. We convert from 38.7 ppb of benzene to a fraction of AEGL-1. The result is  $7.44 \times 10^{-4}$
5. We construct an “equivalent”  $\text{SO}_2$  concentration using  $7.44 \times 10^{-4} \times \text{AEGL-1}_{\text{SO}_2}$ , or 0.15 ppb  $\text{SO}_2$
6. We determine the AQI for 0.15 ppb  $\text{SO}_2$  (which is  $0.15/35 \times 50 = 0.21$  AQI points).

We note that the OSHA STEL is a factor 10.4 lower than the AEGL-1, and using it as the basis for the calculation would increase the impact of benzene somewhat.

Some pollutants don't have an AEGL-1. For example, biphenyl. It has an AEGL-2 of 9.6 ppm. The estimate of the airborne concentration of biphenyl is 18.5  $\mu\text{g}/\text{m}^3$  (2.9 ppb), so the equivalent  $\text{SO}_2$  concentration would be the AEGL-2 of  $\text{SO}_2$  (750 ppb)  $\times 2.9 / 9600$  or 0.23 ppb of  $\text{SO}_2$ . This would have an AQI of  $0.23 / 35 \times 50 = 0.33$  AQI units which matches the calculated value.

Table S6. AQI Categories (from Wildfire Smoke A Guide for Public Health Officials; Revised July 2008, With 2012 AQI Values)

| Category                                  | Notes                                                                                                                                                                                                                                             |
|-------------------------------------------|---------------------------------------------------------------------------------------------------------------------------------------------------------------------------------------------------------------------------------------------------|
| Good 0-50                                 | If smoke exposure is forecast, implement communication plan.                                                                                                                                                                                      |
| Moderate 51-100                           | Issue public service announcements (PSAs) advising public about health effects and symptoms and ways to reduce exposure. Distribute information about exposure avoidance.                                                                         |
| Unhealthy for Sensitive Subgroups 101-150 | If smoke event projected to be prolonged, evaluate and notify possible sites for cleaner air shelters. If smoke event projected to be prolonged, prepare evacuation plans.                                                                        |
| Unhealthy 151-200                         | Consider closing schools, possibly based on school environment and travel considerations. Consider canceling public events, based on public health and travel considerations.                                                                     |
| Very unhealthy 201-300                    | Consider closing some or all schools (newer schools with a central air cleaning filter may be more protective than older leakier homes). Cancel outdoor events (e.g., concerts, sporting events).                                                 |
| Hazardous                                 | Close schools. Cancel outdoor events (e.g., concerts, sporting events). Consider closing workplaces not essential to public health. If PM level is projected to remain high for a prolonged time, consider evacuation of sensitive subpopulations |

Table S7. Expanded version of Table 5 that includes additional tracers of the tire fire smoke (benzene, CO, and SO<sub>2</sub>, 1,3 butadiene, acrolein, CO<sub>2</sub>, and PM<sub>2.5</sub> B[a]P), using emission factor ratios. Additional columns can be added based on what measurements are available, using emission factor ratios, or Δconcentration ratios. These are prepared assuming p=1.

| 1-h Average Pollutant in Tire Smoke |                              |                   |                         |                       |                                      |                                        | 1-h Average Background PM <sub>2.5</sub> (μg/m <sup>3</sup> ) |                 |     |     |     |     |
|-------------------------------------|------------------------------|-------------------|-------------------------|-----------------------|--------------------------------------|----------------------------------------|---------------------------------------------------------------|-----------------|-----|-----|-----|-----|
| Benzene (ppb)                       | Benzene (μg/m <sup>3</sup> ) | CO (ppb)          | CO (μg/m <sup>3</sup> ) | SO <sub>2</sub> (ppb) | SO <sub>2</sub> (μg/m <sup>3</sup> ) | PM <sub>2.5</sub> (μg/m <sup>3</sup> ) | 0                                                             | 10              | 20  | 30  | 40  | 50  |
| 0                                   | 0                            | 0                 | 0                       | 0                     | 0                                    | 0                                      | 0                                                             | 13              | 26  | 39  | 52  | 62  |
| 0.015                               | 0.047                        | 20                | 23                      | 0.5                   | 1.3                                  | 1                                      | 2                                                             | 15              | 28  | 42  | 54  | 64  |
| 0.029                               | 0.094                        | 40                | 46                      | 1.0                   | 2.7                                  | 2                                      | 4                                                             | 17              | 30  | 44  | 55  | 65  |
| 0.044                               | 0.14                         | 60                | 68                      | 1.5                   | 4                                    | 3                                      | 6                                                             | 19              | 33  | 46  | 57  | 67  |
| 0.06                                | 0.19                         | 80                | 91                      | 2.0                   | 5                                    | 4                                      | 8                                                             | 21              | 35  | 48  | 59  | 69  |
| 0.07                                | 0.24                         | 100               | 114                     | 2.5                   | 7                                    | 5                                      | 10                                                            | 23              | 37  | 50  | 61  | 71  |
| 0.15 <sup>a</sup>                   | 0.47                         | 199               | 228                     | 5                     | 13                                   | 10                                     | 21                                                            | 34              | 47  | 59  | 69  | 79  |
| 0.29                                | 0.94                         | 398               | 456                     | 10                    | 27                                   | 20                                     | 41                                                            | 54 <sup>b</sup> | 67  | 77  | 87  | 97  |
| 0.44 <sup>b</sup>                   | 1.4                          | 597               | 684                     | 15                    | 40                                   | 30 <sup>c</sup>                        | 62                                                            | 74 <sup>a</sup> | 84  | 94  | 104 | 114 |
| 0.7                                 | 2.4                          | 996               | 1140                    | 25                    | 67                                   | 50 <sup>d</sup>                        | 99                                                            | 109             | 119 | 129 | 139 | 149 |
| 1.5                                 | 4.7                          | 1990              | 2280                    | 51                    | 133                                  | 100                                    | 184                                                           | 194             | 204 | 214 | 222 | 225 |
| 2.9                                 | 9.4                          | 3981              | 4560                    | 102                   | 266                                  | 200                                    | 281                                                           | 284             | 286 | 288 | 291 | 293 |
| 4.4 <sup>e</sup>                    | 14                           | 5971 <sup>f</sup> | 6840                    | 152                   | 400                                  | 300                                    | 330                                                           | 333             | 335 | 337 | 340 | 342 |

<sup>a</sup>This row corresponds to the instantaneous benzene concentration measured at the Pentacrest (downtown Iowa City) on June 2 in a “not in plume / background” sample. Background PM<sub>2.5</sub> was ~10 μg/m<sup>3</sup> placing that hour in the “good” category. A background concentration of 0.05 ppb has been subtracted from the measured value.

<sup>b</sup>This row corresponds to the instantaneous benzene concentration measured in North Liberty on May 27, and at Dane Rd. on June 1. Background PM<sub>2.5</sub> was ~10 μg/m<sup>3</sup> placing those conditions in the “moderate” category. A background concentration of 0.05 ppb has been subtracted from the measured value.

<sup>c</sup>This row corresponds to the worst 1h datapoint from IA-AMS (based on measurements of PM<sub>2.5</sub>). Background PM<sub>2.5</sub> was ~10 μg/m<sup>3</sup> placing those conditions in the “moderate” category.

<sup>d</sup>This row corresponds to the worst 1h datapoint from Hoover Elementary (based on measurements of PM<sub>2.5</sub>). Background PM<sub>2.5</sub> was ~10 μg/m<sup>3</sup> placing those conditions in the “unhealthy for sensitive subpopulations” category.

<sup>e</sup>Both of the plume intercepts (May 28 and June 1) near the landfill (300 m from the landfill fire) had benzene in excess of 4.4 ppb, placing them in the “hazardous” category. The June 1 AQI is corroborated by acrolein and 1,3 butadiene (see h and i) while the May 28 has a much higher ratio of benzene to these other compounds (see g and h).

<sup>f</sup>This row corresponds to instantaneous CO measurements Kansas Ave. (1.0 km) from the plume under “very smoky” conditions on June 4. The CO concentration as a marker of the multipollutant mixture identifies the period as “hazardous” even though the health effect of CO itself is not considered in the AQI and the level of CO is below the TLV-TWA of 29,000  $\mu\text{g}/\text{m}^3$



| 1-h Average Pollutant in Tire Smoke |                                    |                  |                               |                       |                                       |                                            | 1-h Average Background PM <sub>2.5</sub> (µg/m <sup>3</sup> ) |                 |     |     |     |     |
|-------------------------------------|------------------------------------|------------------|-------------------------------|-----------------------|---------------------------------------|--------------------------------------------|---------------------------------------------------------------|-----------------|-----|-----|-----|-----|
| 1,3 Butadiene (ppb)                 | 1,3 Butadiene (µg/m <sup>3</sup> ) | Acrolein (ppt)   | Acrolein (ng/m <sup>3</sup> ) | CO <sub>2</sub> (ppm) | CO <sub>2</sub> (mg/m <sup>3</sup> C) | PM <sub>2.5</sub> BaP (ng/m <sup>3</sup> ) | 0                                                             | 10              | 20  | 30  | 40  | 50  |
| 0                                   | 0                                  | 0                | 0                             | 0                     | 0                                     | 0                                          | 0                                                             | 13              | 26  | 39  | 52  | 62  |
| 0.020                               | 0.044                              | 0.87             | 2                             | 0.31                  | 0.15                                  | 0.70                                       | 2                                                             | 15              | 28  | 42  | 54  | 64  |
| 0.040                               | 0.088                              | 1.7              | 4                             | 0.61                  | 0.30                                  | 1.4                                        | 4                                                             | 17              | 30  | 44  | 55  | 65  |
| 0.060                               | 0.13                               | 2.6              | 6                             | 0.92                  | 0.45                                  | 2.1                                        | 6                                                             | 19              | 33  | 46  | 57  | 67  |
| 0.080                               | 0.18                               | 3.5              | 8                             | 1.23                  | 0.60                                  | 2.8                                        | 8                                                             | 21              | 35  | 48  | 59  | 69  |
| 0.10                                | 0.22                               | 4.4              | 10                            | 1.53                  | 0.75                                  | 3.5                                        | 10                                                            | 23              | 37  | 50  | 61  | 71  |
| 0.20                                | 0.44                               | 8.7              | 20                            | 3.1                   | 1.5                                   | 7.0                                        | 21                                                            | 34              | 47  | 59  | 69  | 79  |
| 0.40                                | 0.90                               | 17               | 40                            | 6.1                   | 3.0                                   | 14                                         | 41                                                            | 54 <sup>b</sup> | 67  | 77  | 87  | 97  |
| 0.60                                | 1.3                                | 26               | 60                            | 9.2                   | 4.5                                   | 21                                         | 62                                                            | 74 <sup>a</sup> | 84  | 94  | 104 | 114 |
| 1.0 <sup>e</sup>                    | 2.2                                | 44               | 100                           | 15                    | 7.5                                   | 35                                         | 99                                                            | 109             | 119 | 129 | 139 | 149 |
| 2.0                                 | 4.4                                | 87 <sup>h</sup>  | 200                           | 31                    | 15                                    | 70                                         | 184                                                           | 194             | 204 | 214 | 222 | 225 |
| 3.0                                 | 8.8                                | 174              | 400                           | 61                    | 30                                    | 140                                        | 281                                                           | 284             | 286 | 288 | 291 | 293 |
| 4.0 <sup>i</sup>                    | 13                                 | 262 <sup>j</sup> | 600                           | 92                    | 45                                    | 210                                        | 330                                                           | 333             | 335 | 337 | 340 | 342 |

<sup>e</sup>This row corresponds to the instantaneous 1,3 butadiene measurement at the landfill edge on May 28, placing the sampling the “unhealthy for sensitive subpopulations” category. This conflicts with the benzene measurements (see note e).

<sup>h</sup>This row marks the acrolein MDL for the TO-15 sampling done during the Iowa City fire

<sup>i</sup>This row corresponds to the instantaneous 1,3 butadiene measurement at the landfill edge on June 1. This places the sample in the “hazardous category” and matches the determination based on benzene (note e) and acrolein (note j).

<sup>j</sup>The instantaneous acrolein at the landfill fire edge on June 1 exceeded this row’s threshold by a factor of 6. This places the sample in the “hazardous category” and matches the determination based on benzene (note e) and 1,3 butadiene (note i).

| 8-h Average Pollutant in Tire Smoke |                              |          |                         |                       |                                      |                                        | 8-h Average Background PM <sub>2.5</sub> (µg/m <sup>3</sup> ) |                  |     |     |     |     |
|-------------------------------------|------------------------------|----------|-------------------------|-----------------------|--------------------------------------|----------------------------------------|---------------------------------------------------------------|------------------|-----|-----|-----|-----|
| Benzene (ppb)                       | Benzene (µg/m <sup>3</sup> ) | CO (ppb) | CO (µg/m <sup>3</sup> ) | SO <sub>2</sub> (ppb) | SO <sub>2</sub> (µg/m <sup>3</sup> ) | PM <sub>2.5</sub> (µg/m <sup>3</sup> ) | 0                                                             | 10               | 20  | 30  | 40  | 50  |
| 0                                   | 0                            | 0        | 0                       | 0                     | 0                                    | 0                                      | 0                                                             | 23               | 45  | 64  | 82  | 100 |
| 0.015                               | 0.047                        | 20       | 23                      | 0.5                   | 1.3                                  | 1                                      | 3                                                             | 26               | 48  | 67  | 85  | 102 |
| 0.029                               | 0.094                        | 40       | 46                      | 1.0                   | 2.7                                  | 2                                      | 6                                                             | 29               | 52  | 69  | 87  | 105 |
| 0.044                               | 0.14                         | 60       | 68                      | 1.5                   | 4                                    | 3                                      | 9                                                             | 32               | 54  | 72  | 90  | 107 |
| 0.06                                | 0.19                         | 80       | 91                      | 2.0                   | 5                                    | 4                                      | 12                                                            | 35               | 57  | 74  | 92  | 110 |
| 0.07                                | 0.24                         | 100      | 114                     | 2.5                   | 7                                    | 5                                      | 15                                                            | 38               | 59  | 77  | 95  | 112 |
| 0.15                                | 0.47                         | 199      | 228                     | 5                     | 13                                   | 10                                     | 30                                                            | 53               | 72  | 90  | 108 | 125 |
| 0.29                                | 0.94                         | 398      | 456                     | 10                    | 27                                   | 20                                     | 61                                                            | 79               | 97  | 115 | 132 | 150 |
| 0.44                                | 1.4                          | 597      | 684                     | 15                    | 40                                   | 30 <sup>k</sup>                        | 87                                                            | 105 <sup>c</sup> | 123 | 140 | 157 | 173 |
| 0.7                                 | 2.4                          | 996      | 1140                    | 25                    | 67                                   | 50                                     | 138                                                           | 155              | 172 | 188 | 192 | 196 |
| 1.5                                 | 4.7                          | 1990     | 2280                    | 51                    | 133                                  | 100                                    | 231                                                           | 235              | 239 | 244 | 248 | 252 |
| 2.9                                 | 9.4                          | 3981     | 4560                    | 102                   | 266                                  | 200                                    | 318                                                           | 328              | 338 | 348 | 358 | 368 |
| 4.4                                 | 14                           | 5971     | 6840                    | 152                   | 400                                  | 300                                    | 444                                                           | 449              | 454 | 459 | 465 | 470 |

<sup>k</sup>This row corresponds to the worst 8-h period from Hoover Elementary (based on measurements of PM<sub>2.5</sub>). Background PM<sub>2.5</sub> was ~10 µg/m<sup>3</sup> placing those conditions in the “unhealthy for sensitive subpopulations” category.

| 8-h Average Pollutant in Tire Smoke |                                       |                |                               |                       |                                       |                                            | 8-h Average Background PM <sub>2.5</sub> (µg/m <sup>3</sup> ) |                  |     |     |     |     |
|-------------------------------------|---------------------------------------|----------------|-------------------------------|-----------------------|---------------------------------------|--------------------------------------------|---------------------------------------------------------------|------------------|-----|-----|-----|-----|
| 1,3<br>Butadiene (ppb)              | 1,3<br>Butadiene (µg/m <sup>3</sup> ) | Acrolein (ppt) | Acrolein (ng/m <sup>3</sup> ) | CO <sub>2</sub> (ppm) | CO <sub>2</sub> (mg/m <sup>3</sup> C) | PM <sub>2.5</sub> BaP (ng/m <sup>3</sup> ) | 0                                                             | 10               | 20  | 30  | 40  | 50  |
| 0                                   | 0                                     | 0              | 0                             | 0                     | 0                                     | 0                                          | 0                                                             | 23               | 45  | 64  | 82  | 100 |
| 0.020                               | 0.044                                 | 0.87           | 2                             | 0.31                  | 0.15                                  | 0.70                                       | 3                                                             | 26               | 48  | 67  | 85  | 102 |
| 0.040                               | 0.088                                 | 1.7            | 4                             | 0.61                  | 0.30                                  | 1.4                                        | 6                                                             | 29               | 52  | 69  | 87  | 105 |
| 0.060                               | 0.13                                  | 2.6            | 6                             | 0.92                  | 0.45                                  | 2.1                                        | 9                                                             | 32               | 54  | 72  | 90  | 107 |
| 0.080                               | 0.18                                  | 3.5            | 8                             | 1.23                  | 0.60                                  | 2.8                                        | 12                                                            | 35               | 57  | 74  | 92  | 110 |
| 0.10                                | 0.22                                  | 4.4            | 10                            | 1.53                  | 0.75                                  | 3.5                                        | 15                                                            | 38               | 59  | 77  | 95  | 112 |
| 0.20                                | 0.44                                  | 8.7            | 20                            | 3.1                   | 1.5                                   | 7.0                                        | 30                                                            | 53               | 72  | 90  | 108 | 125 |
| 0.40                                | 0.90                                  | 17             | 40                            | 6.1                   | 3.0                                   | 14                                         | 61                                                            | 79               | 97  | 115 | 132 | 150 |
| 0.60                                | 1.3                                   | 26             | 60                            | 9.2                   | 4.5                                   | 21                                         | 87                                                            | 105 <sup>c</sup> | 123 | 140 | 157 | 173 |
| 1.0                                 | 2.2                                   | 44             | 100                           | 15                    | 7.5                                   | 35                                         | 138                                                           | 155              | 172 | 188 | 192 | 196 |
| 2.0                                 | 4.4                                   | 87             | 200                           | 31                    | 15                                    | 70                                         | 231                                                           | 235              | 239 | 244 | 248 | 252 |
| 3.0                                 | 8.8                                   | 174            | 400                           | 61                    | 30                                    | 140                                        | 318                                                           | 328              | 338 | 348 | 358 | 368 |
| 4.0                                 | 13                                    | 262            | 600                           | 92                    | 45                                    | 210                                        | 444                                                           | 449              | 454 | 459 | 465 | 470 |

| 24-h Average Pollutant in Tire Smoke |                              |          |                         |                       |                                      |                                        | 24-h Average Background PM <sub>2.5</sub> (µg/m <sup>3</sup> ) |                 |     |     |     |     |
|--------------------------------------|------------------------------|----------|-------------------------|-----------------------|--------------------------------------|----------------------------------------|----------------------------------------------------------------|-----------------|-----|-----|-----|-----|
| Benzene (ppb)                        | Benzene (µg/m <sup>3</sup> ) | CO (ppb) | CO (µg/m <sup>3</sup> ) | SO <sub>2</sub> (ppb) | SO <sub>2</sub> (µg/m <sup>3</sup> ) | PM <sub>2.5</sub> (µg/m <sup>3</sup> ) | 0                                                              | 10              | 20  | 30  | 40  | 50  |
| 0                                    | 0                            | 0        | 0                       | 0                     | 0                                    | 0                                      | 0                                                              | 42              | 67  | 88  | 112 | 137 |
| 0.015                                | 0.047                        | 20       | 23                      | 0.5                   | 1.3                                  | 1                                      | 5                                                              | 47              | 70  | 91  | 115 | 140 |
| 0.029                                | 0.094                        | 40       | 46                      | 1.0                   | 2.7                                  | 2 <sup>l</sup>                         | 10                                                             | 52 <sup>e</sup> | 73  | 94  | 118 | 143 |
| 0.044                                | 0.14                         | 60       | 68                      | 1.5                   | 4                                    | 3                                      | 15                                                             | 54              | 76  | 97  | 121 | 146 |
| 0.06                                 | 0.19                         | 80       | 91                      | 2.0                   | 5                                    | 4                                      | 20                                                             | 57              | 79  | 100 | 125 | 150 |
| 0.07                                 | 0.24                         | 100      | 114                     | 2.5                   | 7                                    | 5                                      | 25                                                             | 60              | 82  | 103 | 128 | 153 |
| 0.15                                 | 0.47                         | 199      | 228                     | 5                     | 13                                   | 10 <sup>m</sup>                        | 49                                                             | 75 <sup>d</sup> | 96  | 119 | 144 | 160 |
| 0.29                                 | 0.94                         | 398      | 456                     | 10                    | 27                                   | 20                                     | 82                                                             | 104             | 127 | 152 | 167 | 173 |
| 0.44                                 | 1.4                          | 597      | 684                     | 15                    | 40                                   | 30                                     | 111                                                            | 134             | 159 | 175 | 180 | 186 |
| 0.7                                  | 2.4                          | 996      | 1140                    | 25                    | 67                                   | 50                                     | 174                                                            | 190             | 195 | 201 | 206 | 211 |
| 1.5                                  | 4.7                          | 1990     | 2280                    | 51                    | 133                                  | 100                                    | 246                                                            | 251             | 257 | 262 | 267 | 272 |
| 2.9                                  | 9.4                          | 3981     | 4560                    | 102                   | 266                                  | 200                                    | 368                                                            | 378             | 388 | 398 | 408 | 418 |
| 4.4                                  | 14                           | 5971     | 6840                    | 152                   | 400                                  | 300                                    | 494                                                            | 504             | 514 | 524 | 534 | 544 |

<sup>l</sup>This row corresponds to the worst 24-h period from IA-AMS (based on dispersion model of PM<sub>2.5</sub>). Background PM<sub>2.5</sub> was ~10 µg/m<sup>3</sup> placing the category as “good.” This is corroborated by B[a]P measurements (see note n).

<sup>m</sup>This row corresponds to the worst 24-h period from Hoover Elementary (based on measurements of PM<sub>2.5</sub>). Background PM<sub>2.5</sub> was ~10 µg/m<sup>3</sup> placing those conditions in the “moderate” category.

| 24-h Average Pollutant in Tire Smoke |                                       |                |                               |                       |                                       |                                            | 24-h Average Background PM <sub>2.5</sub> (µg/m <sup>3</sup> ) |                 |     |     |     |     |
|--------------------------------------|---------------------------------------|----------------|-------------------------------|-----------------------|---------------------------------------|--------------------------------------------|----------------------------------------------------------------|-----------------|-----|-----|-----|-----|
| 1,3<br>Butadiene (ppb)               | 1,3<br>Butadiene (µg/m <sup>3</sup> ) | Acrolein (ppt) | Acrolein (ng/m <sup>3</sup> ) | CO <sub>2</sub> (ppm) | CO <sub>2</sub> (mg/m <sup>3</sup> C) | PM <sub>2.5</sub> BaP (ng/m <sup>3</sup> ) | 0                                                              | 10              | 20  | 30  | 40  | 50  |
| 0                                    | 0                                     | 0              | 0                             | 0                     | 0                                     | 0                                          | 0                                                              | 42              | 67  | 88  | 112 | 137 |
| 0.020                                | 0.044                                 | 0.87           | 2                             | 0.31                  | 0.15                                  | 0.70                                       | 5                                                              | 47              | 70  | 91  | 115 | 140 |
| 0.040                                | 0.088                                 | 1.7            | 4                             | 0.61                  | 0.30                                  | 1.4 <sup>n</sup>                           | 10                                                             | 52 <sup>e</sup> | 73  | 94  | 118 | 143 |
| 0.060                                | 0.13                                  | 2.6            | 6                             | 0.92                  | 0.45                                  | 2.1                                        | 15                                                             | 54              | 76  | 97  | 121 | 146 |
| 0.080                                | 0.18                                  | 3.5            | 8                             | 1.23                  | 0.60                                  | 2.8                                        | 20                                                             | 57              | 79  | 100 | 125 | 150 |
| 0.10                                 | 0.22                                  | 4.4            | 10                            | 1.53                  | 0.75                                  | 3.5                                        | 25                                                             | 60              | 82  | 103 | 128 | 153 |
| 0.20                                 | 0.44                                  | 8.7            | 20                            | 3.1                   | 1.5                                   | 7.0                                        | 49                                                             | 75 <sup>d</sup> | 96  | 119 | 144 | 160 |
| 0.40                                 | 0.90                                  | 17             | 40                            | 6.1                   | 3.0                                   | 14                                         | 82                                                             | 104             | 127 | 152 | 167 | 173 |
| 0.60                                 | 1.3                                   | 26             | 60                            | 9.2                   | 4.5                                   | 21                                         | 111                                                            | 134             | 159 | 175 | 180 | 186 |
| 1.0                                  | 2.2                                   | 44             | 100                           | 15                    | 7.5                                   | 35                                         | 174                                                            | 190             | 195 | 201 | 206 | 211 |
| 2.0                                  | 4.4                                   | 87             | 200                           | 31                    | 15                                    | 70                                         | 246                                                            | 251             | 257 | 262 | 267 | 272 |
| 3.0                                  | 8.8                                   | 174            | 400                           | 61                    | 30                                    | 140                                        | 368                                                            | 378             | 388 | 398 | 408 | 418 |
| 4.0                                  | 13                                    | 262            | 600                           | 92                    | 45                                    | 210                                        | 494                                                            | 504             | 514 | 524 | 534 | 544 |

<sup>n</sup>This row corresponds to the worst 24-h period from IA-AMS (based on 24-h B[a]P measurements). Background PM<sub>2.5</sub> was ~10 µg/m<sup>3</sup> placing the category as “good.” This is corroborated by dispersion modeling (see note k).

**Incident Name: Landfill Fire of 2012**  
**Dates of Assignment: May 26 – June 9, 2012**  
**After Action Review – Air Quality**  
**Monitoring Activities**

**EVENT SUMMARY –**

At 6:38 pm on Saturday, May 26, the Fire Department responded to a call of a fire at the Iowa City Landfill, 3900 Hebl Ave., one mile west of Hwy 218 in Iowa City. The fire appears to have started at the working face of the landfill where garbage was dumped earlier in the day.

The fire then spread to the landfill liner system which includes a drainage layer of approximately 1.3 million shredded tires. Once the fire was in the drainage system, strong south winds spread it quickly along the west edge of the landfill cell.

Landfill staff used bulldozers to cut a gap in the shredded tire layer to contain the fire, but the fire spread across the gap before it could be completed. Staff regrouped and cut two additional fire breaks to halt the rapidly moving fire.

Protecting the health and safety of the public and workers onsite remained the number one priority for the City and all cooperating agencies as the tire shreds continued to burn. Also of primary concern was keeping the fire from spreading to adjacent landfill cells and to a portion of the new cell that was successfully isolated in the days following the fire's ignition. On June 1, Iowa City Mayor Matt Hayek signed a Local Disaster Declaration document. The declaration facilitated access to state and federal resources, including advanced air quality monitoring and thermal imaging technology to assist with mitigating the incident.

The Johnson County Health Department partnered with the State Hygienic Laboratory, Iowa Department of Natural Resources and subject matter experts with the University of Iowa to monitor air quality throughout the region. Officials with the United States Environmental Protection Agency were actively partnering with local and state officials on those issues related to air quality. The following precautions were issued to the general public:

Persons in the path of the smoke plume should avoid exposure to the smoke as much as possible. Persons who have respiratory, heart or other conditions which may be aggravated by smoke, pregnant women, and the young and elderly should shelter in places with outside sources of air shut off. Most home air conditioning units recirculate air from the interior and should be sufficient. Businesses and other structures which draw in outside air should close outside air sources if the smoke plume is present. Avoid outdoor activities such as exercising if the smoke plume is present. Nursing homes, day cares and other businesses which care for the elderly, very young, and persons with respiratory diseases should take special care to monitor the health of clients and to minimize exposure to the smoke plume.

On Tuesday, June 12, Environmental Restoration contractors completed a stir, burn, and cover strategy to finally contain the fire and stop the burning. Heavy equipment was in operation for a period of nine (9) days. Occasional flare-ups remain a possibility while overhaul operations are ongoing.

---

***After Action Review (AAR)***  
***Lessons Learned***

The AAR is a tool that allows teams to learn from what they are doing and improve their performance. It is a structured discussion of specific events, inclusive of the entire team, and focused on learning from action to improve performance.

Lessons learned from the AAR discussion must be captured and put back into action and applied to performance quickly. The AAR is designed to help us understand why objectives were or were not accomplished, what really happened, what lessons can be learned, and how we can apply those lessons to improve performance.

AAR for Air Quality Activities:

June 27, 2012 1:00 – 3:00 pm

Johnson County Health and Human Services Building, Room 119D

Participants: Doug Beardsley and James Lacina, Johnson County Public Health; Scott Spak, U of I Environmental Policy Program at the Public Policy Center; Dave Wilson, JC Emergency Management Coordinator; Robert Bullard, U of I Dept. of Chemical & Biochemical Engineering; Betsy Stone and Jared Downard, U of I Dept. of Chemistry; Pam Kostle and Wanda Reiter-Kintz, State Hygienic Laboratory; Josh Sobaski and Kurt Levetzow, IA Dept. of Natural Resources (by phone); Shane Dodge, Linn County Public Health (by phone);

### **1. What was the most notable success at the incident that others may learn from? Please explain.**

At the incident response level, use of the Incident Command System (ICS) was very instrumental in assuring that roles within the incident were understood and that information was shared and staff kept up-to-date on activities. Cooperation and willingness to help on the part of partner organizations was tremendous. Of particular note were the State Hygienic Laboratory and Linn County Public Health. Staff from both agencies were on the phone with JCPH early on (and late night) with offers to assist with air monitoring. We had DNR involvement which led to participation by EPA as well to offer technical assistance.

The learning curve, while steep, was handled well by all parties involved. Again, the success was due to the large number of resources and the infrastructure (internet, search engines, access to subject matter experts, teleconferencing, etc.) to access them. Staff at JCPH made the response a priority and had to juggle very full schedules from other duties in order to conduct the monitoring activities (as did staff from other agencies and organizations). This prioritization in order to address an emergency was appreciated.

The early development of a health message related to the smoke and the consistency of the message in light of research and air monitoring seemed to lend to the success of Iowa City's efforts and public information. The City was very open with information and very proactive with making information accessible to the public.

### **2. What were some of the most difficult challenges faced and how were they overcome? Please explain.**

Since this was a new area in which JCPH did not have expertise, we tried to locate some sort of standard approach for monitoring a smoke plume. There was ample research on the constituents of tire fire smoke and some enlightening case studies of other large fires, but we could not locate a "how to" approach on monitoring. We proceeded with what made sense and shared that approach with local, state and federal partners for feedback. There was general consensus that our approach was good. We continued by sharing test results and continuously looked for feedback on monitoring strategies. It turns out that the strategy is fairly simple; drive in to the smoke at varying distances from the source and take samples. Most of our samples were "grab" samples. A better approach would be to take longer term

samples to average out exposures. This challenge was overcome by doing what could be done and then being open with the public and being consistent and proactive with the message.

There was some initial confusion about who should be contacted and exact protocols to follow in order to access State and Federal resources. Early involvement of the County EMA was helpful, but sometimes there may have been parallel efforts aimed at the same resource. There was some confusion about “ownership” of SHL resources and how the DNR fit in to that. JCPH was not aware or did not understand the relationship of SHL capabilities and DNR funding of those services and whether or not SHL needed DNR acknowledgement to act. This may have been immaterial, however (no “need to know”) as SHL secured whatever acknowledgements were needed. JC EMA was making requests but found that the feedback loop from State partners was inconsistent. This may have been complicated by too many people calling various duty officers (i.e. JCPH called the IDPH duty officer for assistance in contacting SHL and Linn CPH rather than directing all traffic via JC EOC.). Despite any confusion, there was no perceptible delay in deploying resources once we decided where we wanted to get samples. EMA and SHL will follow up to review who has what authorities and how we can streamline or reaffirm the correct notification procedures to secure air monitoring assets in the future.

While we would evaluate the air monitoring efforts as being successful, better coordination would have been welcome. JCPH was primarily coordinating the efforts and communicating with its partners who were providing testing services. Feedback during the AAR was that several strategy meetings with all air monitoring partners involved would have been helpful and may have changes how assets were deployed. Solution: in an incident of this magnitude in the future, staff up the air monitoring branch so a branch director is less involved in actual monitoring activities and has time to focus on coordination and strategy.

Additionally, there was some confusion or duplication when requesting Federal assets in the form of EPA assistance. When JCPH sent in a request for EPA assistance and then spoke with the EPA representative, other communication and/or requests had already been sent to EPA and they had already received deployment orders before speaking with JCPH. We appreciated their prompt response but there were some moments of concern about deployment and “what are they planning to do” on the part of JCPH. It turned out well in this case, which is the bottom line, but it caused a bit of unnecessary worry.

Another challenge or lesson learned was not being aware of and using the full capabilities for air monitoring which exists on the Hazmat vehicles. The Hazmat testing equipment was eventually deployed as the incident got in to the “stir, burn, and cover” activities. EMA will review these capabilities and ensure that they are listed as a resource for similar future events.

### **3. What changes, additions or deletions are recommended to augment agency training curriculums and/or operating policies?**

As mentioned above, we will review our procedures for requesting assistance outside of our jurisdiction. We will review if we should pursue individual agreements with Linn County Public Health and the SHL or if current procedures working through the EOC are adequate to meet liability, reimbursement and other issues associated with receiving assistance. We will continue to train staff in the ICS and role of the EOC.

### **4. What issues were not resolved to your satisfaction and need further review? Based on what was learned, what is your recommendation for resolution?**



There were no major issues which had not been resolved during the course of the incident or have not already been addressed above.

**5. What remedies will the organization pursue and who will champion each initiative? If possible, attach timelines for completion.**
